1  
2  
3  
4  
5  
6  
7  
8  
9  
10  
11  
12  
13  
14  
15  
16  
17  
18  
19  
20  
21  
22

**Adeno-associated virus type 2 (AAV2) uncoating is a stepwise process and is linked to structural reorganization of the nucleolus (full title)**

**AAV2 uncoating occurs stepwise and depends on nucleolar reorganization (short title)**

Sereina O. Sutter<sup>1¶</sup>, Anouk Lkharrazi<sup>1¶</sup>, Elisabeth M. Schraner<sup>1</sup>, Kevin Michaelsen<sup>1</sup>, Anita Felicitas Meier<sup>1</sup>, Bernd Vogt<sup>1</sup>, Hildegard Büning<sup>2</sup>, and Cornel Fraefel<sup>1\*</sup>

<sup>1</sup> Institute of Virology, University of Zurich, Zurich, Switzerland

<sup>2</sup> Institute of Experimental Hematology, Hannover Medical School, Hannover, Germany

\* Corresponding author

E-mail: [cornel.fraefel@uzh.ch](mailto:cornel.fraefel@uzh.ch) (CF)

¶ These authors contributed equally to this work.

## 23 **Abstract**

24 Nucleoli are membrane-less structures located within the nucleus and are known to be  
25 involved in many cellular functions, including stress response and cell cycle regulation.  
26 Besides, many viruses can employ the nucleolus or nucleolar proteins to promote  
27 different steps of their life cycle such as replication, transcription and assembly. While  
28 adeno-associated virus type 2 (AAV2) capsids have previously been reported to enter  
29 the host cell nucleus and accumulate in the nucleolus, both the role of the nucleolus in  
30 AAV2 infection, and the viral uncoating mechanism remain elusive. In all prior studies  
31 on AAV uncoating, viral capsids and viral genomes were not directly correlated on the  
32 single cell level, at least not in absence of a helper virus. To elucidate the properties  
33 of the nucleolus during AAV2 infection and to assess viral uncoating on a single cell  
34 level, we combined immunofluorescence analysis for detection of intact AAV2 capsids  
35 and capsid proteins with fluorescence *in situ* hybridization for detection of AAV2  
36 genomes. The results of our experiments provide evidence that uncoating of AAV2  
37 particles occurs in a stepwise process that is completed in the nucleolus and supported  
38 by alteration of the nucleolar structure.

39

## 40 **Author Summary**

41 Adeno-associated virus (AAV) capsids have been reported to enter the host cell  
42 nucleus and accumulate in the nucleolus. However, both the role of the nucleolus in  
43 AAV2 infection as well as the viral uncoating mechanism remain unknown. Here, we  
44 provide evidence that uncoating of the AAV2 particle is a stepwise process that is  
45 completed in the nucleolus and supported by alteration of the nucleolar morphology.

46

## 47 Introduction

48 Adeno-associated virus type 2 (AAV2) is a small, non-pathogenic, helper virus-  
49 dependent parvovirus with a single-stranded (ss) DNA genome of approximately 4.7  
50 kb. In absence of a helper virus, AAV2 can integrate its genome site-preferentially into  
51 the adeno-associated virus integration site (AAVS1) on human chromosome 19 or  
52 persist in an episomal form in the nucleus [1,2]. Co-infection with a helper virus, such  
53 as herpes simplex virus type 1 (HSV-1), leads to a lytic replication cycle including the  
54 production of progeny virus particles [3]. The AAV2 genome consists of two large open  
55 reading frames (ORFs) flanked by 145 nt long inverted terminal repeats (ITRs) located  
56 on either side. The *rep* gene encodes the four non-structural Rep proteins, two of which  
57 are transcribed from the p5 and the p19 promoter, respectively. An alternative splice  
58 site regulates expression of the alternative transcripts, whereby the unspliced RNAs  
59 encode Rep78 and Rep52, whereas Rep68 and Rep40 are encoded by their  
60 corresponding spliced variant [4,5]. The promoter activity is regulated by the Rep  
61 binding site (RBS), therefore allowing the Rep protein to act either as a trans-activator  
62 or repressor [6]. In the absence of a helper virus, only little expression of Rep takes  
63 place, which nonetheless is sufficient to repress any further transcription.

64 The three structural proteins VP1, VP2 and VP3, constituting the icosahedral capsid,  
65 are encoded by the *cap* gene. Furthermore, the *cap* gene encodes the assembly-  
66 activating protein (AAP) and the membrane-associated accessory protein (MAAP) by  
67 means of nested alternative ORFs [7,8].

68 Adeno-associated viruses exhibit a broad cellular tropism [9]. Referring to AAV2, the  
69 cellular receptors facilitating cell attachment and entry, include heparan sulfate  
70 proteoglycan, human fibroblast growth factor receptor 1,  $\alpha_v\beta_5$  integrin,  $\alpha_5\beta_1$  integrin  
71 (reviewed in [10]) and the host factor KIAA0319L (synonymous AAVR) [11]. Different

72 entry pathways were proposed for AAV2, including clathrin- and dynamin-dependent  
73 endocytosis or internalization supported by the Ras-related C3 botulinum toxin  
74 substrate 1 (Rac1), a small GTPase and a major effector of macropinocytosis  
75 (reviewed in [10]). However, internalization through clathrin-independent carriers  
76 (CLICs) and GPI-enriched endocytic compartments (GEECs) was suggested to be  
77 part of the major endocytic infection route [12]. It was shown that acidification in  
78 endocytic compartments and the activity of proteases trigger conformational changes  
79 of the AAV2 capsid, leading to the exposure of the N-terminal domain of the VP1  
80 protein, known as VP1 unique region (VP1<sub>u</sub>). VP1<sub>u</sub> containing a phospholipase A2  
81 domain (PLA<sub>2</sub>) as well as a nuclear localization signal enables the endosomal  
82 escape of AAV2 and nuclear entry [13]. After nuclear entry, AAV2 capsids were  
83 shown to accumulate in nucleoli mediated by nucleolar associated proteins [14,15].  
84 Nucleoli are membrane-less structures located within the nucleus and are organized  
85 in three distinct compartments. The fibrillary center is surrounded by the dense  
86 fibrillary compartment and further embedded in the granular compartment. The  
87 structural (re-)organization of the nucleolus is strongly linked to its function in  
88 transcription and pre-rRNA processing. Besides, the nucleolus is known to be  
89 involved in many other cellular functions, including stress response, cell cycle  
90 regulation and apoptosis (reviewed in [16–19]). Additionally, many different viruses  
91 such as HSV-1, human immunodeficiency virus type 1 (HIV-1) or adenovirus (AdV)  
92 can harness the nucleolus or specific nucleolar proteins in order to promote different  
93 steps of their life cycle including replication, transcription and assembly [20,21]. While  
94 AAV2 capsids have previously been reported to enter the host cell nucleus and  
95 accumulate in the nucleolus in a nucleolin- and nucleophosmin-dependent manner  
96 [14,15], both the role of the nucleolus in AAV2 infection, and the viral uncoating  
97 mechanism remain elusive. The current paradigm proposes a model where AAV2

98 capsids accumulate in the nucleolus upon nuclear entry and then translocate to the  
99 nucleoplasm for uncoating [22]. This model is based on the observation that treating  
100 cells with either proteasome inhibitors or hydroxyurea, both known to enhance AAV2  
101 transduction, improve nucleolar accumulation and mobilization of virions into the  
102 nucleoplasm, respectively. Besides, the post-transcriptional silencing of  
103 nucleophosmin, a highly expressed multifunctional nucleolar phosphoprotein,  
104 enhanced nucleolar accumulation and increased transduction similar to the treatment  
105 with proteasome inhibitors, while silencing of nucleolin, an abundant non-ribosomal  
106 protein of the nucleolus [23], mobilized capsids to the nucleoplasm and enhanced  
107 transduction similar to the treatment with hydroxyurea. Other studies concluded that  
108 uncoating occurs before or during nuclear entry [24–26]. These conclusions were  
109 mainly based on the fact that only AAV2 genomes were detected in the nucleus and  
110 that perinuclear genomes did not always co-localize with AAV2 capsids. In all these  
111 prior studies on AAV uncoating, however, viral capsids and viral genomes were not  
112 directly correlated on the single cell level, at least not in absence of a helper virus  
113 [27], but rather quantified by quantitative (q)PCR, Western or slot blot analysis, single  
114 AAV capsid specific immunostainings or fluorescently labelled AAV virions  
115 [22,24,26–31].

116 To elucidate the sink-like properties of the nucleolus during AAV2 infection and to  
117 assess viral uncoating on a single cell level, we combined immunofluorescence (IF)  
118 analysis to detect intact AAV2 capsids as well as capsid proteins with fluorescence *in*  
119 *situ* hybridization (FISH) to visualize AAV2 genomes. The results of our experiments  
120 support the hypothesis that AAV2 uncoating takes place in the nucleolus in a cell cycle-  
121 dependent manner.

## 122 **Results**

### 123 **AAV2 capsids and AAV2 genomes accumulate in the** 124 **nucleoli of infected cells**

125 Previous studies have shown that nucleoli act as a sink for incoming AAV2 capsids.

126 However, it is not known whether the nucleolar localization is merely a result of the  
127 interaction of the AAV2 capsids with specific nucleolar proteins or a pre-requisite for  
128 an early step of the viral replication cycle such as uncoating or second strand-  
129 synthesis. While prior reports suggested that AAV2 capsids translocate from the  
130 nucleoli to the nucleoplasm for uncoating, these studies have not simultaneously  
131 tracked capsids and genomes on the single cell level [22,32].

132 Here, we investigated the spatial and temporal distribution of both AAV2 capsids and  
133 AAV2 genomes in single cells. For this, normal human fibroblast (NHF) cells were  
134 either mock-infected or infected with wild-type (wt) AAV2 at a multiplicity of infection  
135 (MOI) of 20'000 genome containing particles (gcp) per cell (herein referred to as  
136 MOI). The cells were fixed at different time points post infection and processed for  
137 combined multicolor immunofluorescence (IF) analysis to detect AAV2 particles using  
138 an antibody that detects a conformational capsid epitope and fluorescence *in situ*  
139 hybridization (FISH) to detect AAV2 genomes (hereinafter referred to as IF-FISH).

140 The results showed both AAV2 capsids and AAV2 DNA accumulated in the nucleoli  
141 of wtAAV2 infected cells over time (Fig 1, A and B). Neither AAV2 capsids nor  
142 genomes were detected in the nucleoli upon infection of cells with mutant AAV2  
143 <sup>76</sup>HD/AN (S1 Fig) which contains two mutated residues in the catalytic center of the  
144 phospholipase A2 (PLA<sub>2</sub>) domain and is therefore deficient for endosomal escape  
145 [33].

146 Interestingly, we did not only observe capsid-positive, genome-negative (AAV2  
147 capsid+DNA-) signals in the cytoplasm, as it would be expected when capsids are  
148 intact and therefore do not allow binding of the FISH probe to the virus genome, but  
149 frequently also capsid-positive, genome-positive signals (AAV2 capsid+DNA+; see  
150 insets Fig 1A, 0 h, 3 h, 10 h). This indicates that either the virus stocks contained  
151 improperly encapsidated AAV2 DNA or that the AAV2 genome is accessible to the  
152 FISH probe within the cytoplasm (herein referred to as genome accessibility). While  
153 the main focus of this study was on simultaneously tracking AAV2 capsids and AAV2  
154 genomes in the nucleus, it was important to first investigate the origin of the AAV2  
155 capsid-positive and AAV2 genome-positive signals in the cytoplasm.

156

157 **Fig 1. Spatial distribution of AAV2 capsids and DNA over time.** NHF cells were  
158 infected with wtAAV2 (MOI 20`000). At various time points post infection, the cells  
159 were fixed and processed for multicolor IF analysis combined with FISH and confocal  
160 laser scanning microscopy (CLSM). Nucleoli (Nuc) were visualized using an antibody  
161 against fibrillarlin (yellow). Intact capsids were stained using an antibody that detects  
162 a conformational capsid epitope (green). AAV2 DNA (magenta) was detected with an  
163 Alexa Fluor (AF) 647 labeled, amine-modified DNA probe that binds to the AAV2  
164 genome. (A) Spatial and temporal distribution of AAV2 capsids and DNA. The white  
165 line represents the edge of the nucleoli (fibrillarlin staining). (B) Orthogonal  
166 projections of a z-stack at 24 hpi. The white line represents the edge of the nucleus  
167 (4`,6-diamidino-2-phenylindole (DAPI) staining). (C) Image-based quantification of  
168 the uncoating rate of 50 individual cells per time point in the nucleolus and (D) in the  
169 cytoplasm. p-values were calculated using an unpaired Student`s t-test (\* -  $p \leq 0.05$ ,  
170 \*\* -  $p \leq 0.01$ , \*\*\* -  $p \leq 0.001$ , \*\*\*\* -  $p \leq 0.0001$ ).

171

172 **Co-detection of AAV2 capsids and AAV2 genomes in the**  
173 **cytoplasm is supported by AAV2 genome accessibility and**  
174 **requires acidification**

175 To address the question whether wtAAV2 stocks contained improperly encapsidated  
176 AAV2 genomes, wtAAV2 particles were directly applied to fibronectin coated  
177 coverslips and processed for IF-FISH (Fig 2A). While in the untreated wtAAV2  
178 samples all capsid-positive signals (green) were genome-negative, only genome-  
179 positive signals (red) but no capsids were observed upon incubation for 5 min at  
180 75°C, which is known to destabilize AAV2 capsids [34]. In the heat-treated samples,  
181 the AAV2 capsids were indeed disintegrated as confirmed by electron microscopy  
182 (Fig 2B), and the AAV2 genome signals disappeared upon DNase I treatment (Fig  
183 2A). These experiments demonstrate that the virus stocks were not contaminated  
184 with improperly encapsidated AAV2 DNA. To address the hypothesis that co-  
185 detection of AAV2 capsids and AAV2 genomes in the cytoplasm is enabled by  
186 genome accessibility, we determined the ratios of AAV2 capsid+DNA+/AAV2  
187 capsid+DNA- signals at different timepoints after infection using CellProfiler. As  
188 shown in Fig 1C and 1D, these ratios significantly increased with time of infection,  
189 both in the cytoplasm and the nucleoli, indicating AAV2 capsid+DNA- signals  
190 decrease over time.

191 As acidification has been shown to lead to conformational changes in the AAV2  
192 capsid and to be important for AAV2 infection, endosomal escape and nuclear entry  
193 in particular [25], we examined whether acidification leads to co-detection of AAV2  
194 capsid- and AAV2 genome signals in the cytoplasm. To this end, NHF cells were  
195 treated with bafilomycin A1 (50 or 200 nM) 1 h prior to infection with wtAAV2 (MOI  
196 20`000). At 3 hours post infection (hpi), the samples were processed for IF-FISH and



197 CLSM. Treating cells with bafilomycine A1, a vacuolar H<sup>+</sup>-ATPase inhibitor which  
198 blocks endosomal acidification, significantly reduced the import of AAV2 capsids into  
199 the nucleus (Fig 3C), as demonstrated previously [25], and also the AAV2  
200 capsid+DNA+/AAV2 capsid+DNA- signal ratios in the cytoplasm (Fig 3, A and B; see  
201 also insets in Fig 3A). Collectively, these experiments confirm the specificity of the IF-  
202 FISH assay and support the hypothesis that the co-localization of AAV2 capsids and  
203 AAV2 DNA in the cytoplasm is due to genome accessibility and is enhanced by  
204 acidification.

205

206 **Fig 2. AAV2 particles on fibronectin coated coverslips.** (A) wtAAV2 particles  
207 were directly applied to fibronectin coated coverslips and processed for IF analysis  
208 combined with FISH and CLSM. Intact capsids were stained using an antibody that  
209 detects a conformational capsid epitope (green). AAV2 DNA (red) was detected with  
210 an Alexa Fluor (AF) 647 labeled, amine-modified DNA probe that binds to the AAV2  
211 genome. (B) Electron photomicrographs show complete disintegration of the AAV2  
212 capsids at 75°C.

213

214 **Fig 3. Acidification enhances genome accessibility of AAV2.** NHF cells were  
215 treated with bafilomycine A1 (50 or 200 nM) or DMSO 1 h prior to infection with  
216 wtAAV2 (MOI 20`000). At 3 hpi, the cells were fixed and processed for multicolor IF  
217 analysis combined with FISH and CLSM. Nucleoli (Nuc) were visualized using an  
218 antibody against fibrillarlin (yellow). Intact capsids were stained using an antibody  
219 that detects a conformational capsid epitope (green). AAV2 DNA (magenta) was  
220 detected with an Alexa Fluor (AF) 647 labeled, amine-modified DNA probe that  
221 binds to the AAV2 genome. (A) Genome accessibility of AAV2 capsids after  
222 inhibition of the endosome-lysosome system acidification. The white line represents

223 the edge of the nucleoli (fibrillarin staining). (B) Image-based quantification of the  
224 genome accessibility (ratio of AAV2 capsid+DNA+/AAV2 capsid+DNA- signal) of 50  
225 individual cells per sample in the cytoplasm and (C) nuclear AAV2 capsid counts.  
226 p-values were calculated using an unpaired Student's t-test (\* -  $p \leq 0.05$ ,  
227 \*\* -  $p \leq 0.01$ , \*\*\* -  $p \leq 0.001$ , \*\*\*\* -  $p \leq 0.0001$ ).

228

## 229 **Detection of AAV2 capsids negatively correlates with** 230 **detection of AAV2 capsid proteins**

231 After establishing that the co-detection of AAV2 capsids and AAV2 genomes by  
232 combined IF-FISH and CLSM is not because of improperly encapsidated virus  
233 particles, we continued to analyze the distribution of AAV2 capsids and genomes in  
234 the nuclei of individual cells. For this, NHF cells were mock-infected or infected with  
235 wtAAV2 (MOI 20`000) and 24 h later processed for combined IF-FISH and CLSM to  
236 detect AAV2 capsids and genomes. Interestingly, we observed three distinct  
237 patterns of nucleolar AAV2 genome and AAV2 capsid staining: (I) nucleoli with  
238 robust AAV2 genome and AAV2 capsid signal, (II) nucleoli with robust AAV2 DNA  
239 signal but weak AAV2 capsid signal, and (III) nucleoli in which only the viral DNA  
240 was detected in absence of capsids (Fig 4, A and B, see also S1 movie). The pattern,  
241 in particular the observation of AAV2 DNA in the nucleoli in absence of AAV2  
242 capsids, led us to the hypothesis that complete AAV2 uncoating takes place in the  
243 nucleolus.

244 If the absence of AAV2 capsid staining in the nucleoli with positive AAV2 genome  
245 signal was indeed due to complete viral uncoating, we would expect the presence of  
246 disassembled AAV2 capsid proteins in those nucleoli. To assess this hypothesis,  
247 NHF cells were mock-infected or infected with wtAAV2 (MOI 20`000) and 24 h later

248 processed for combined IF-FISH and CLSM to detect AAV2 capsids (conformational  
249 epitope), AAV2 capsid proteins (linear epitope) and AAV2 DNA (Fig 5, S2 Fig and  
250 Fig 9). The results show a negative correlation of AAV2 capsids and AAV2 capsid  
251 proteins in the nucleolus, supporting the hypothesis that AAV2 uncoating indeed  
252 takes place in the nucleoli. For technical reasons, co-staining of AAV2 capsids, AAV2  
253 capsid proteins VP1/2/3 and AAV2 DNA did not allow to directly visualize nucleoli.  
254 However, the DAPI staining in Fig 5 indirectly reveals the position of the nucleoli.  
255 Moreover, individual staining of either AAV2 capsids or AAV2 capsid proteins  
256 together with AAV2 DNA and a nucleolar marker demonstrated that both intact AAV2  
257 capsids (e.g., Fig 1) and AAV2 capsid proteins VP1/2 (Fig 5B) accumulated with  
258 AAV2 DNA in nucleoli.

259 Intriguingly, we noticed a distinct difference in the nucleolar structure when  
260 comparing AAV2 DNA-positive nucleoli that were positive also for intact AAV2  
261 capsids with AAV2 DNA-positive nucleoli that were negative for intact AAV2 capsids  
262 or positive for AAV2 capsid proteins. Specifically, the nucleoli appeared dense when  
263 positive for both AAV2 DNA and AAV2 capsids and dispersed when positive for  
264 AAV2 DNA and negative for AAV2 capsids or positive for AAV2 DNA and AAV2  
265 capsid proteins (Fig 4A, Fig 5B). Image-based quantification of the mean integrated  
266 intensity of AAV2 capsid signals relative to the nucleolar structure revealed a higher  
267 capsid signal intensity in dense nucleoli than in dispersed nucleoli (Fig 4C). Overall,  
268 these experiments imply that complete AAV2 uncoating takes place in the nucleoli  
269 and coincides with changes in the nucleolar structure.

270 As the ratios of dense to dispersed nucleoli was comparable in mock-infected and  
271 wtAAV2 infected cells (S3 Fig), we hypothesized that not virus infection *per se* but  
272 cellular processes such as apoptosis, stress response, or cell cycle regulation are  
273 responsible for the different structures of AAV2 capsid-positive and AAV2 DNA-

274 positive versus AAV2 capsid-negative and AAV2 DNA-positive nucleoli and may  
275 thereby control AAV2 uncoating.

276

277 **Fig 4. Absence of intact AAV2 capsids in AAV2 genome positive nucleoli**  
278 **points towards complete viral uncoating.** NHF cells were infected with wtAAV2  
279 (MOI 20`000). At 24 hpi, the cells were fixed and processed for multicolor IF analysis  
280 combined with FISH and CLSM. Nucleoli (Nuc) were visualized using an antibody  
281 against fibrillarin (yellow). Intact capsids were stained using an antibody that detects  
282 a conformational capsid epitope (green). AAV2 DNA (magenta) was detected with an  
283 Alexa Fluor (AF) 647 labeled, amine-modified DNA probe that binds to the AAV2  
284 genome. Nuclei were counterstained with DAPI and illustrated as white lines. (A)  
285 Distinct pattern (I - III) of AAV2 capsid signal in cells with AAV2 genome positive  
286 nucleoli. (B) Quantification of 50 individual cells with distinct AAV2 capsid signal. (C)  
287 Image-based quantification of the integrated intensity of AAV2 capsid signals in  
288 dense or dispersed nucleoli of 70 individual cells. p-values were calculated using an  
289 unpaired Student`s t-test (\* -  $p \leq 0.05$ , \*\* -  $p \leq 0.01$ , \*\*\* -  $p \leq 0.001$ , \*\*\*\* -  $p \leq 0.0001$ ).

290

291 **Fig 5. Co-detection of AAV2 DNA with AAV2 capsids and AAV2 capsid**  
292 **proteins.** NHF cells were infected with wtAAV2 (MOI 20`000). At 24 hpi, the cells  
293 were fixed and processed for multicolor IF analysis combined with FISH and CLSM.  
294 (A) Intact capsids (green) or capsid proteins (yellow) were detected using either an  
295 antibody against intact AAV2 capsids (conformational capsid epitope) or an  
296 antibody (linear epitope) against VP1, VP2 and VP3. AAV2 DNA (red) was detected  
297 with an Alexa Fluor (AF) 647 labeled, amine-modified DNA probe that binds to the  
298 AAV2 genome. Nuclei were counterstained with DAPI (blue). (B) AAV2 capsid  
299 proteins (green) were detected using an antibody (linear epitope) against VP1 and

300 VP2. AAV2 DNA (magenta) was detected by linking the amine-modified DNA to  
301 AF647. Nucleoli (Nuc) were visualized using an antibody against fibrillarin (yellow).  
302 Nuclei were counterstained with DAPI and illustrated as white lines.

303

## 304 **Changes in nucleolar morphology correlate with cell cycle** 305 **progression**

306 To address the question whether the changes in nucleolar structure are linked to cell  
307 cycle progression, we performed image-based cell cycle analysis using DAPI and  
308 fibrillarin staining. To this end, a DAPI integrated intensity protocol was adapted from  
309 Ruokos et al. [35] and validated in NHF cells by correlating cyclin A, which is only  
310 expressed in late S and G2 cell cycle phases, with the integrated intensity of DAPI  
311 (S4 Fig; see also materials and methods). As a first step, the background of each  
312 image was subtracted (step 1). Next, nuclei as well as the cyclin A staining were  
313 identified as primary objects using CellProfiler (step 2). In step 3 and 4, nuclei and  
314 cyclin A were related to each other and the DAPI integrated intensity of each cell  
315 was measured. The measured properties of each individual cell were subsequently  
316 exported and read into Matlab, where histograms were plotted. Visual thresholds  
317 were set (red dotted lines) to distinguish the distribution of the histogram into G1, S  
318 and G2 (step 5). The images were then analyzed with a second CellProfiler pipeline  
319 using the visual thresholds of the integrated intensity of DAPI to classify cells into  
320 G1: 54.85%, S: 9.67% and G2: 35.48% (step 6). Lastly, overlay images, showing the  
321 cell cycle stage of each cell, were saved to allow the tracking of individual cells for  
322 further analysis (step 7).

323 To further validate the adapted protocol, NHF cells were synchronized using a  
324 double thymidine block. After the release, the cells were either mock-treated or

325 treated with nocodazole (200 nM) for 24 hours to induce a G2 cell cycle arrest. For  
326 flow cytometry, the cells were harvested, fixed and stained with DAPI. For CLSM,  
327 the coverslips were embedded in ProLong Anti-Fade mountant containing DAPI.  
328 Images were analyzed as described in the section cell cycle analysis based on 4',6-  
329 diamidino-2-phenylindole (DAPI) staining. Both methods, flow cytometry and CLSM,  
330 showed a significant decrease of the number of cells within G1 cell cycle phase and  
331 a significant increase of cells in G2 cell cycle phase upon nocodazole treatment (S5  
332 Fig), indicating that the adapted protocol is suitable for image-based cell cycle  
333 staging. Next, the fibrillar staining was correlated to the cell cycle profile of the  
334 mock-infected and wtAAV2 infected NHF cells. Figure 6 shows that the ratios of  
335 dense to dispersed nucleoli decrease during cell cycle progression in both mock-  
336 infected and AAV2 infected cells. Overall, the data imply that the observed  
337 morphological changes of the nucleoli indeed coincide with cell cycle progression  
338 and were not due to AAV2-induced stress response (see also S3 Fig).

339

340 **Fig 6. Nucleolar reorganization during cell cycle progression.** Image-based  
341 analysis of the ratios of dense to dispersed nucleoli of 100 individual mock- or AAV2  
342 infected cells in different cell cycle phases (G1, S and G2). p-values were calculated  
343 using an unpaired Student's t-test (\* -  $p \leq 0.05$ , \*\* -  $p \leq 0.01$ , \*\*\* -  $p \leq 0.001$ ,  
344 \*\*\*\* -  $p \leq 0.0001$ ).

345

### 346 **G1 cell cycle phase obstructs complete AAV2 uncoating**

347 Since we observed a decrease in the ratio of dense versus dispersed nucleolar  
348 structures (Fig 6 and S6 Fig) during cell cycle progression and a stronger intensity  
349 of AAV2 capsid signals in dense nucleoli than in dispersed nucleoli (Fig 4C), we next  
350 addressed the question whether cell cycle progression is important for complete

351 AAV2 uncoating. For this, NHF cells were arrested in the G1 phase by a double  
352 thymidine treatment before and during infection with wtAAV2 (MOI 20`000). As  
353 control, the cells were released 8 h prior to infection by washing out the thymidine.  
354 At 24 h after infection, there was a robust difference in the cell cycle profile between  
355 G1-arrested cells (approx. 83 % in G1) and released cells (approx. 47% in G1),  
356 confirming the efficient G1 arrest (Fig 7A). Image-based cell cycle analysis showed  
357 that the rate of complete uncoating (AAV2 capsid-DNA+/AAV2 capsid+DNA+) was  
358 approximately 4-fold lower in the G1-arrested cells compared to the released cells  
359 (Fig 7B). The double thymidine block did not *per se* influence the rate of complete  
360 uncoating, as the ratios of AAV2 capsid-DNA+/AAV2 capsid+DNA+ signals in G1  
361 cells were comparable in presence or absence of thymidine (Fig 7C). Moreover,  
362 neither the blocking with nor the release from thymidine influenced the total area of  
363 the nucleoli during cell cycle progression (Fig 7D).

364

365 **Fig 7. G1 cell cycle arrest obstructs complete uncoating.** NHF cells were arrested  
366 in G1 cell cycle phase by a double thymidine block before and during infection with  
367 wtAAV2 (MOI 20`000). As control, the cells were released 8 h prior to infection by  
368 washing out the thymidine. At 24 hpi, the cells were fixed and processed for multicolor  
369 IF analysis combined with FISH, CLSM and image-based analysis of (A) the cell cycle  
370 profile after continuous thymidine block or release, respectively. (B) Quantification of  
371 the total uncoating rate. (C) Image-based quantification of the uncoating rate in G1 cell  
372 cycle phase. (D) Image-based quantification of the nucleolar area after continuous  
373 thymidine block or release, respectively. p-values were calculated using an unpaired  
374 Student`s t-test (\* -  $p \leq 0.05$ , \*\* -  $p \leq 0.01$ , \*\*\* -  $p \leq 0.001$ , \*\*\*\* -  $p \leq 0.0001$ ).

375

376 **Induction of nucleolar disruption overcomes thymidine-**  
377 **mediated obstruction of AAV2 uncoating**

378 NHF cells were arrested in the G1 phase of the cell cycle by a double thymidine  
379 block before and during infection with wtAAV2 (MOI 20`000). At 24 hpi, the cells  
380 were treated with actinomycin D (50 nM) for 1 h in order to induce nucleolar  
381 disruption (reviewed in [36]), fixed and processed for multicolor IF-FISH and CLSM  
382 (Fig 8A). Analysis of the cell cycle profile confirmed the cell cycle arrest upon  
383 thymidine and actinomycin D treatment (60% of cells in G1). The actinomycin D  
384 mediated nucleolar disruption in thymidine-treated cells led to a considerable  
385 decrease of capsid signals in the nucleoli and nucleoplasm and an increase of AAV2  
386 genome signals in the nucleoplasm (Fig 8, A and B). This shows that complete  
387 uncoating can be induced by changes in the nucleolar structure (disruption) even  
388 when cells are in G1 phase where normally no efficient complete uncoating is  
389 observed (Fig 7).

390

391 **Fig 8. Actinomycin D treatment overcomes thymidine-mediated obstruction of**  
392 **AAV2 uncoating.** NHF cells were arrested in G1 cell cycle phase by a double  
393 thymidine block before and during infection with wtAAV2 (MOI 20`000). At 24 hpi, the  
394 cells were treated with actinomycin D for 1 h, fixed and processed for multicolor IF  
395 analysis combined with FISH and CLSM. (A) Nucleoli (Nuc) were visualized using an  
396 antibody against fibrillarin (yellow). Intact capsids were stained using an antibody that  
397 detects a conformational capsid epitope (green). AAV2 DNA (red) was detected with  
398 an Alexa Fluor (AF) 647 labeled, amine-modified DNA probe that binds to the AAV2  
399 genome. (B) Image-based quantification of 50 individual cells per condition for



400 nucleolar capsid, total nuclear capsid or total nuclear AAV2 genome signals. p-values  
401 were calculated using an unpaired Student's t-test (\* -  $p \leq 0.05$ , \*\* -  $p \leq 0.01$ ,  
402 \*\*\* -  $p \leq 0.001$ , \*\*\*\* -  $p \leq 0.0001$ ).

403

## 404 **Capsid disassembly coincides with cell cycle progression**

405 To further assess whether capsid disassembly overlaps with cell cycle progression,  
406 NHF cells were either mock-infected or infected with wtAAV2 (MOI 20`000). 24 h  
407 later, the cells were fixed and processed for IF-FISH, CLSM and image-based cell  
408 cycle analysis and quantification. Specifically, we used the DAPI integrated intensity  
409 protocol to determine the cell cycle phase and the IF-FISH protocol to detect intact  
410 AAV2 capsids, the disassembled AAV2 VP1/2/3 capsid proteins, and the AAV2 DNA  
411 (Fig 9). In 55% of the cells in G1 cell cycle phase but only in 29% of the cells in S/G2  
412 we observed the accumulation of AAV2 DNA together with AAV2 capsids (genome  
413 accessibility). In contrast, the number of cells in which the AAV2 DNA did not  
414 accumulate together with AAV2 capsids but rather with AAV2 capsid proteins VP1,  
415 VP2 and VP3 (complete uncoating) increased from 50% in G1 to 80% in S/G2. The  
416 same observation held true for neonatal human dermal fibroblasts (HDFn) cells  
417 infected with wtAAV2 (S7 Fig). Overall, our data strongly indicate that capsid  
418 disassembly coincides with cell cycle progression and nucleolar alterations.

419

420 **Fig 9. Capsid disassembly coincides with cell cycle progression.** NHF cells  
421 were infected with wtAAV2 (MOI 20`000). At 24 hpi, the cells were fixed and  
422 processed for multicolor IF analysis combined with FISH and CLSM. (A) Intact  
423 capsids (green) or capsid proteins (yellow) were detected using either an antibody  
424 against intact AAV2 capsids (conformational capsid epitope) or an antibody (linear  
425 epitope) against VP1, VP2 and VP3. AAV2 DNA (magenta) was detected with an

426 Alexa Fluor (AF) 647 labeled, amine-modified DNA probe that binds to the AAV2  
427 genome. Nuclei were counterstained with DAPI and illustrated as white lines. (B)  
428 Quantification of at least 70 nuclei positive for intact AAV2 capsids or capsid  
429 proteins during cell cycle progression.

430

## 431 **Discussion**

432 Nucleoli are membrane-less and dynamic subnuclear structures, which were mainly  
433 known for their role in ribosome biosynthesis. However, nucleoli have a function in  
434 numerous other cellular processes as well, such as cell cycle regulation, stress  
435 response and apoptosis (reviewed in [16–19]). Proteomic approaches led to the  
436 identification of roughly 4`500 nucleolar associated proteins of which only a third is  
437 linked to ribosome biogenesis [37,38].

438 Many different viruses can exploit the nucleolus or nucleolar proteins to drive different  
439 steps of their life cycle including replication, transcription, and assembly (reviewed in  
440 [20,21,39,40]). For example, HSV-1 induces the redistribution of nucleolin from the  
441 nucleolus into HSV-1 replication compartments in a ICP4-dependent manner, thereby  
442 leading to enhanced HSV-1 replication and disruption of the nucleolar structure [41].

443 Similarly, nucleolar upstream binding factor (UBF) and nucleophosmin (B23.1) are  
444 recruited to adenovirus replication compartments to promote viral DNA replication [42–  
445 44]. The autonomous parvovirus minute virus of mice has been shown to replicate its  
446 DNA in the nucleoli of mouse fibroblasts [45,46]. Additionally, borna disease virus  
447 transcription and replication take place in the nucleoli as well [47]. Moreover, specific  
448 mRNAs and proteins of many different viruses, including HIV-1, Japanese encephalitis  
449 virus, and Semliki Forest virus traffic through the nucleolus for processing, and the  
450 inhibition of such trafficking affects virus replication [48–50].

451 Helper virus-supported AAV2 DNA replication occurs in nuclear replication  
452 compartments that are distinctly separate from nucleoli (S8 Fig). However, AAV2  
453 interacts with nucleoli at both early and late stages of the replication cycle, cell entry  
454 and assembly. Upon nuclear entry AAV2 capsids have been shown to accumulate in  
455 the nucleoli [14,15]. Later in infection, intact AAV2 capsids were detected also in the  
456 nucleoplasm. Treatment of cells with hydroxyurea or proteasome inhibitors, both of  
457 which are known to improve AAV2 transduction efficiency, increased either nucleolar  
458 accumulation of AAV2 capsids or their relocalization into the nucleoplasm. Moreover,  
459 the post-transcriptional silencing of nucleophosmin enhanced nucleolar accumulation  
460 and increased transduction comparable to the proteasome inhibitor treatment, while  
461 the siRNA-mediated silencing of nucleolin mobilized capsids to the nucleoplasm and  
462 enhanced transduction similar to the treatment with hydroxyurea. These observations  
463 led to the hypothesis that AAV2 uncoating takes place in the nucleoplasm [22].  
464 However, in the afore mentioned study and all other studies, viral capsids and viral  
465 genomes were not directly correlated on the single cell level but rather analyzed by  
466 quantitative (q)PCR, Western blot and immunofluorescence [22,24–27,29–31].  
467 By employing combined immunofluorescence analysis with fluorescence *in situ*  
468 hybridization (IF-FISH) and confocal laser scanning microscopy, we monitored the  
469 spatial and temporal distribution of AAV2 capsids and genomes on the single cell  
470 level and observed that AAV2 DNA accumulates together with AAV2 capsids in the  
471 nucleoli of AAV2 infected cells, thereby confirming previous findings that the  
472 nucleolus acts as a sink for incoming AAV2 particles. In addition, our IF-FISH assay  
473 provides evidence for the stepwise uncoating of the AAV2 particle. Step 1 occurs in  
474 the cytoplasm and leads to AAV2 genome accessibility where the viral capsid is still  
475 recognized by an antibody that binds to a conformational capsid epitope and co-  
476 localizes with AAV2 DNA. Step 2 takes place within the nucleoli and results in the

477 complete disassembly of the AAV2 capsids and the accumulation of AAV2 DNA and  
478 AAV2 capsid proteins.

479 The exact mechanism that drives step 1 of the AAV2 uncoating process remains to  
480 be investigated. However, our data show that it is enhanced by acidification, as co-  
481 detection of AAV2 capsids and AAV2 DNA in the cytoplasm was reduced in cells  
482 treated with bafilomycin A1, a vacuolar H<sup>+</sup>-ATPase inhibitor. The interaction of  
483 importin  $\beta$  and the N-terminal end of VP1 [24] as well as the pH-dependent structural  
484 reorganization of the AAV2 capsid leading to the extrusion of the nuclear localization  
485 signals located in VP1<sub>u</sub> and VP1/VP2 N-termini [13,51,52] have been shown to be  
486 relevant for efficient nuclear entry of the AAV2 capsid. Whether or not the  
487 accessibility of the AAV2 genome for the AAV2 DNA specific FISH probe in AAV2  
488 capsids that are still recognized by a conformational capsid antibody is due to pH-  
489 dependent structural rearrangements of the capsid or rather due to the protrusion of  
490 the AAV2 DNA from an almost intact AAV2 capsid, as it has been shown for  
491 thermally induced AAV2 genome release [53], requires further investigation. The  
492 accessibility of the AAV2 genome, however, might provide further evidence for the  
493 Toll-like receptor 9 (TLR9) mediated antiviral activation state in AAV2 infected  
494 untransformed cells [54].

495 Our image-based analysis of the nucleolar structure as well as AAV2 DNA, AAV2  
496 capsids, and AAV2 capsid proteins, relative to the cell cycle profile provides strong  
497 evidence that step 2 of the uncoating process, the complete disassembly of the  
498 capsid, occurs in the nucleolus. The data also support the hypothesis that the  
499 complete disassembly of AAV2 capsids is induced by the structural reorganization  
500 of the nucleolus in a cell cycle-dependent manner.

501 While it is common for viruses to take advantage of the cell cycle or to undermine it  
502 in order to drive different stages of their life cycle (reviewed in [55]), little is known

503 about viruses availing the cell cycle to drive their uncoating process. A recent study  
504 demonstrated that the HIV-1 is unable to uncoat its core in quiescent CD4+  
505 lymphocytes and that the uncoating activity requires transition from G<sub>0</sub>/G<sub>1<sub>a</sub></sub> to G<sub>1<sub>b</sub></sub>  
506 stage, arguing for the demand of cell cycle-dependent specific factors for HIV-1  
507 uncoating [56]. For foamy virus (FV), capsid uncoating and the formation of the  
508 preintegration complex starts with the onset of mitosis. As the microtubule organizing  
509 center and the associated centrosomes, both being relevant for the life cycle of the  
510 virus, are highly linked to cell cycle regulation, it is likely that cell cycle regulatory  
511 proteins might contribute to FV capsid uncoating [57].

512 Nucleolar proteins such as nucleolin can bind to AAV2 capsids and seem to play a  
513 major role in the AAV2 replication cycle. Several studies demonstrated that nucleolin  
514 is barely detectable in resting cells; in contrast, nucleolin represents the major  
515 nucleolar protein in cycling eukaryotic cells [23,58]. This observation provides  
516 evidence for a link between AAV2 capsids, cell cycle progression and nucleolar  
517 proteins.

518 The interaction of some virus proteins with the nucleoli has been shown to be regulated  
519 by the cell cycle as well. For example, the human cytomegalovirus UL83 protein and  
520 the coronavirus nucleocapsid protein have been shown to localize to the nucleolus  
521 preferentially in the G<sub>1</sub> and the G<sub>2</sub> phase of the cell cycle, respectively. Most  
522 interestingly, we have previously reported that AAV2 gene expression and DNA  
523 replication occur primarily in the G<sub>2</sub> phase of the cell cycle [59]. This cell cycle-  
524 dependence was not due to inefficient second-strand synthesis in cells in G<sub>1</sub> nor to  
525 cell cycle-dependent DNA damage responses, as gene expression from a double-  
526 stranded self-complementary AAV2 vector was also reliant on cells in the G<sub>2</sub> phase of  
527 the cell cycle and the inhibition of specific kinases in DNA damage signaling did not

528 result in a shift of gene expression to cells in G1. Moreover, AAV2 transduction  
529 efficiency was shown to be lower in quiescent cells compared to proliferating cells [60]  
530 Based on our new finding that the accumulation of AAV2 DNA together with  
531 disassembled AAV2 capsid proteins in dispersed nucleoli coincides with the G2 phase  
532 of the cell cycle, it is tempting to speculate that cell cycle-dependent AAV2 gene  
533 expression and DNA replication is controlled by cell cycle-dependent reorganization of  
534 the nucleolar structure that enables AAV2 uncoating. This hypothesis is further  
535 supported by the observation that perturbations that lead to changes in the nucleolar  
536 architecture such as actinomycin D treatment (this study), helper virus infection, or  
537 post-transcriptional silencing of nucleolin, enhance AAV2 transduction. However, the  
538 exact mechanism of the disassembly of the AAV2 capsid by nucleolar reorganization  
539 during cell cycle progression remains to be further investigated.

540

## 541 **Materials and methods**

### 542 **Cells and viruses**

543 Normal human fibroblast (NHF) cells were kindly provided by X.O. Breakefield  
544 (Massachusetts General Hospital, Charlestown, MA, USA). NHF cells, neonatal  
545 human dermal fibroblast cell line HDFn (ATCC PCS-201-010, American Type Culture  
546 Collection, Rockville, Md, USA) and African green monkey kidney cells (Vero cells,  
547 ATCC, American Type Culture Collection, Rockville, Md, USA) were maintained in  
548 growth medium containing Dulbecco's modified Eagle medium (DMEM)  
549 supplemented with 10% fetal bovine serum (FBS), 100 U/ml penicillin G, 100 µg/ml  
550 streptomycin, and 0.25 µg/ml amphotericin B (1% AB) at 37°C in a 95% air-5% CO<sub>2</sub>  
551 atmosphere. Wild-type (wt) AAV2 was produced by H. Buening (University of  
552 Hannover, Hannover, Germany) and the Viral Vector Facility (VVF) of the

553 Neuroscience Center Zurich (ZNZ). The VP1 AAV2 mutant (<sup>76</sup>HD/AN) was  
554 constructed according to Girod et al. [33] and produced by the VVF.  
555 Briefly, the <sup>76</sup>HD/AN mutant construct was generated by mutating two key residues  
556 <sup>76</sup>HD to <sup>76</sup>AN using K-<sup>76</sup>HD/AN (5' GCGGCCCTCGAGGCCAACAAAGCCTACGACCGG  
557 3'), L-<sup>76</sup>HD/AN (5' CCGGTCGTAGGCTTTGTTGGCCTCGAGGGCCGC 3'), *psub-201*  
558 [61] containing the full-length AAV2 genome as template and the QuikChange Site-  
559 Directed Mutagenesis Kit (Agilent Technologies).

## 560 **Antibodies**

561 The following primary antibodies were used: anti-AAV2 intact particle (A20, ProGen;  
562 dilution for Immunofluorescence [IF] 1:50), anti-AAV VP1/VP2/VP3 (VP51, ProGen,  
563 dilution for IF 1:10), anti-AAV VP1/VP2 (A69, ProGen, dilution for IF 1:10), anti-AAV2  
564 Rep (Fitzgerald Industries, 10R-A111A, dilution for IF 1:10), anti-fibrillarin (Abcam  
565 ab5821; dilution for IF 1:200), anti-cyclin A (Santa Cruz sc-751, dilution for IF 1:500).  
566 The following secondary antibodies were used: Alexa Fluor 594 goat anti-rabbit IgG  
567 (Life Technologies A11037, dilution for IF 1:500), Alexa Fluor 488 goat anti-mouse IgG  
568 (Invitrogen A11001, dilution for IF 1:500).

## 569 **Viral infection and treatments**

570 NHF, HDFn or Vero cells were seeded onto coverslips (12-mm diameter;  
571 Glaswarenfabrik Karl Hecht GmbH & Co. KG, Sondheim, Germany) in 24-well tissue  
572 culture plates at a density of 3x10<sup>4</sup> cells per well. The next day the cells were washed  
573 with PBS and either mock-infected or infected with wtAAV2 at a multiplicity of  
574 infection (MOI) of 20`000 genome containing particles (gcp) per cell in 250 µl of  
575 DMEM (0% FBS, 1% AB) pre-cooled to 4°C. The plates were first incubated for  
576 30 min at 4°C to synchronize viral uptake and then incubated at 37°C in a humidified  
577 95% air-5% CO<sub>2</sub> incubator for the indicated time period. For acidification experiments

578 NHF cells were treated with bafilomycine A1 (50 or 200 nM) or DMSO in DMEM  
579 (10% FBS, 1% AB) 1 h prior to infection with wtAAV2. G1 cell cycle phase arrest  
580 prior to infection was induced by a double thymidine block. For this, cells were  
581 seeded in 10 cm tissue culture dishes ( $5 \times 10^5$  cells per dish) and 12 h later the growth  
582 medium was replaced with medium (DMEM, 10% FBS, 1% AB) containing 3 mM  
583 thymidine. After 12 h of incubation, the cells were washed with PBS, trypsinized and  
584 split at a density of  $6 \times 10^4$  cells per well into 6-well tissue culture plates containing  
585 coverslips. In order to complete the double thymidine block, the growth medium was  
586 replaced 12 hours later by medium containing 3 mM thymidine. After 12 hours, the  
587 cells were either released from the block by washing out the thymidine with PBS or  
588 directly infected with wtAAV2 in the presence of thymidine. Nucleolar disruption was  
589 induced with actinomycin D (50 nM) in DMEM (2% FBS, 1% AB) for 1 h after 24 h of  
590 infection in presence of thymidine.

## 591 **Cell cycle analysis based on 4',6-diamidino-2-phenylindole** 592 **(DAPI) staining**

593 The workflow described is closely related and adapted from the protocol published by  
594 Roukos et al., 2015 ([62]). Briefly, NHF cells were seeded onto coverslips (12-mm  
595 diameter; Glaswarenfabrik Karl Hecht GmbH & Co. KG, Sondheim, Germany) in 24-  
596 well tissue culture plates ( $3 \times 10^4$  cells per well). The next day, the cells were washed  
597 with PBS, processed as indicated in the results and the figure legends, counterstained  
598 with DAPI and imaged by confocal laser scanning microscopy (Leica SP8; Leica  
599 Microsystems, Wetzlar, Germany). An automated CellProfiler (V.2.2.0-V.4.0.7)  
600 pipeline measured the integrated intensity of DAPI. Next, the histograms of DAPI,  
601 corresponding to the DNA content, were plotted and visual thresholds for each cell  
602 cycle phase were selected. These thresholds were finally read back into a secondary



603 CellProfiler pipeline, which lastly allowed tracking of individual cells and  
604 measurements.

## 605 **Comparison of cell cycle classification using flow**

### 606 **cytometry and the DAPI integrated intensity protocol**

607 To validate the DAPI integrated intensity protocol, NHF cells were synchronized using  
608 a double thymidine block (as described above). After the release, the cells were either  
609 mock-treated or treated with nocodazole (200 nM) for 24 hours. For flow cytometry,  
610 the cells were harvested by exposing them to 0.05 % Trypsin-EDTA solution for 10  
611 min, centrifuged and washed with PBS, fixed in 2.5 ml ice-cold 100% ethanol,  
612 centrifuged, washed once again with PBS and stained with a freshly made solution  
613 containing 1 µg/mL DAPI, 0.05% Triton X-100 and 0.1 mg/mL ribonuclease A (RNase  
614 A) in PBS. All samples were incubated for 45 min at 37°C in the dark. After incubation,  
615 the cells were washed twice with PBS and then resuspended in 200 µl PBS prior to  
616 analysis (SONY SP6800 Spectral Analyzer). For confocal laser scanning microscopy,  
617 the coverslips were embedded in ProLong Anti-Fade mountant with DAPI (Molecular  
618 Probes, Eugene, OR, USA) and imaged using a 63x oil immersion objective (Leica  
619 SP8; Leica Microsystems, Wetzlar, Germany). Images were analyzed as described in  
620 the section cell cycle analysis based on 4',6-diamidino-2-phenylindole (DAPI) staining.

## 621 **Combined multicolor immunofluorescence analysis and**

### 622 **fluorescence *in situ* hybridization (FISH)**

623 FISH was performed essentially as described previously by Lux et al. [27]. Briefly, a  
624 3.9-kb DNA fragment containing the AAV2 genome without the inverted terminal  
625 repeats was amplified by PCR from plasmid pDG using forward (5`-  
626 CGGGGTTTTACGAGATTGTG-3`) and reverse (5`-GGCTCTGAATACACGCCATT-  
627 3`) primers and the following conditions: 30 s at 95°C; 35 cycles of 10 s at 98°C, 15 s

628 at 58°C, and 75 s at 72°C; and 10 min at 72°C. The PCR sample was then digested  
629 with DpnI to cut the residual template DNA and purified with the Pure Link PCR  
630 purification kit (Qiagen, Hilden, Germany). The DNA fragment was labeled with 5-(3-  
631 aminoallyl)dUTP by nick translation according to the manufacturer's protocol (Ares  
632 DNA labeling kit, Molecular Probes, Eugene, OR, USA), and the incorporated dUTPs  
633 were labeled with amino-reactive Alexa Fluor 647 dye by using the same Ares DNA  
634 labeling kit. NHF cells were plated onto glass coverslips in 24-well tissue culture plates  
635 at a density of  $3 \times 10^4$  cells per well and 24 h later mock-infected or infected with wtAAV2  
636 (MOI of 20`000). 24 hours after infection, the cells were washed with PBS, fixed for 30  
637 min at room temperature (RT) with 2% PFA (in PBS), and washed again with PBS.  
638 The cells were then quenched for 10 min with 50 mM  $\text{NH}_4\text{Cl}$  (in PBS), washed with  
639 PBS, permeabilized for 10 min with 0.2% Triton X-100 (in PBS), blocked for 10 min  
640 with 0.2% gelatin (in PBS) followed by two washing steps with PBS before blocking for  
641 30 min in PBST (0.05% Tween 20 in PBS) supplemented with 3% BSA at 4°C. After  
642 antibody staining in PBST-BSA (3%, 25  $\mu\text{l}$ /coverslip) for 1h at RT in the dark in a  
643 humidified chamber, the cells were washed three times for 5 min with PBST (0.1%),  
644 post-fixed with 2% PFA and blocked with 50 mM glycine in PBS for 5 min at RT.  
645 Hybridization solution (20  $\mu\text{l}$  per coverslip) containing 1 ng/ $\mu\text{l}$  of the labeled DNA probe,  
646 50% formamide, 7.3% (w/v) dextran sulfate, 15 ng/ $\mu\text{l}$  salmon sperm DNA, and 0.74x  
647 SSC (1x SSC is 0.15 M NaCl and 0.015 M sodium citrate) was denatured for 3 min at  
648 95°C and shock-cooled on ice. The coverslips with the fixed and permeabilized cells  
649 facing down were placed onto a drop (20  $\mu\text{l}$ ) of the denatured hybridization solution  
650 and incubated overnight at 37°C in a humidified chamber (note that the cells were not  
651 denatured, as the AAV2 genome is present as ssDNA). The next day, the coverslips  
652 were washed three times with 2x SSC at 37°C, three times with 0.1x SSC at 60°C, and  
653 twice with PBS at RT. To confirm the FISH signal, some samples (as stated in the

654 results) were treated with DNase I (1U/  $\mu$ l) for 1 h at 37°C followed by inactivation in  
655 30% formamide, 0,1% Triton-X 100 and 2x SSC for 10 min at RT.

656 The cells were then embedded in ProLong Anti-Fade mountant with or without DAPI  
657 (Molecular Probes, Eugene, OR, USA) and imaged by confocal laser scanning  
658 microscopy (Leica SP8; Leica Microsystems, Wetzlar, Germany). To prevent cross talk  
659 between the channels for the different fluorochromes, all channels were recorded  
660 separately, and fluorochromes with longer wavelengths were recorded first. The  
661 resulting images were processed using Imaris V.7.7.2-V.9.6.0 (Bitplane, Oxford  
662 Instruments, Biplane AG, Zurich, Switzerland)

### 663 **Negative contrast stain**

664 For the examination of AAV2 capsid disintegration a negative contrast staining was  
665 performed. For this, 10  $\mu$ l of the wtAAV2 stock were placed onto a parafilm strip and  
666 adsorbed to carbon coated parlodion films mounted on 300 mesh/inch copper grids by  
667 placing upside-down on the drop and incubated for 10min at RT. Washing was done  
668 by transferring the grid to a H<sub>2</sub>O drop. Subsequently the grid was placed onto a drop  
669 of phosphotungstic acid (PTA, pH 7.0) for 60 seconds. Remaining liquid was removed  
670 by tipping the edge of the grid on a filter paper. The samples were analyzed in a Philips  
671 CM 12 transmission electron microscope (Eindhoven, the Netherlands) equipped with  
672 a charge-coupled device (CCD) camera (Ultrascan 1000, Gatan, Pleasanton, CA,  
673 USA) at an acceleration voltage of 100 kV.

### 674 **Image-based quantification and data analysis**

675 For image-based quantification and data analysis, at least 50 individual cells per  
676 sample or condition were recorded and analyzed using different CellProfiler (V.2.2.0-  
677 V.4.0.7) pipelines. The output csv-files were further analyzed using Matlab (R2017a)  
678 and GraphPad Prism 6 to 9. Depending on distribution frequency and standard

679 deviation (SD), statistical analysis of individual cells was either performed by unpaired  
680 Student's t-test or an unpaired t-test with Welch's correction (not assuming equal  
681 SDs). If not stated otherwise, each graph illustrates one representative experiment.

682

## 683 **References**

- 684 1. Samulski RJ, Zhu X, Xiao X, Brook JD, Housman DE, Epstein N, et al. Targeted  
685 integration of adeno-associated virus (AAV) into human chromosome 19. *Embo J.*  
686 1991;10: 3941–3950. doi:10.1002/j.1460-2075.1991.tb04964.x
- 687 2. Sun X, Lu Y, Bish LT, Calcedo R, Wilson JM, Gao G. Molecular Analysis of Vector  
688 Genome Structures After Liver Transduction by Conventional and Self-  
689 Complementary Adeno-Associated Viral Serotype Vectors in Murine and Nonhuman  
690 Primate Models. *Hum Gene Ther.* 2010;21: 750–761. doi:10.1089/hum.2009.214
- 691 3. Buller RM, Janik JE, Sebring ED, Rose JA. Herpes simplex virus types 1 and 2  
692 completely help adenovirus-associated virus replication. *Journal of Virology.* 1981;40:  
693 241–247.
- 694 4. Srivastava A, Lusby EW, Berns KI. Nucleotide sequence and organization of the  
695 adeno-associated virus 2 genome. *J Virol.* 1983;45: 555–564.  
696 doi:10.1128/jvi.45.2.555-564.1983
- 697 5. Laughlin CA, Westphal H, Carter BJ. Spliced adenovirus-associated virus RNA.  
698 *Proc National Acad Sci.* 1979;76: 5567–5571. doi:10.1073/pnas.76.11.5567
- 699 6. Pereira DJ, McCarty DM, Muzyczka N. The adeno-associated virus (AAV) Rep  
700 protein acts as both a repressor and an activator to regulate AAV transcription during

- 701 a productive infection. *J Virol.* 1997;71: 1079–1088. doi:10.1128/jvi.71.2.1079-  
702 1088.1997
- 703 7. Sonntag F, Kother K, Schmidt K, Weghofer M, Raupp C, Nieto K, et al. The  
704 assembly-activating protein promotes capsid assembly of different adeno-associated  
705 virus serotypes. *Journal of Virology.* 2011;85: 12686–12697. doi:10.1128/jvi.05359-  
706 11
- 707 8. Ogden PJ, Kelsic ED, Sinai S, Church GM. Comprehensive AAV capsid fitness  
708 landscape reveals a viral gene and enables machine-guided design. *Science.*  
709 2019;366: 1139–1143. doi:10.1126/science.aaw2900
- 710 9. Asokan A, Schaffer DV, Samulski RJ. The AAV Vector Toolkit: Poised at the  
711 Clinical Crossroads. *Mol Ther.* 2012;20: 699–708. doi:10.1038/mt.2011.287
- 712 10. Nonnenmacher M, Weber T. Intracellular transport of recombinant adeno-  
713 associated virus vectors. *Gene therapy.* 2012;19: 649–658. doi:10.1038/gt.2012.6
- 714 11. Pillay S, Meyer NL, Puschnik AS, Davulcu O, Diep J, Ishikawa Y, et al. An  
715 essential receptor for adeno-associated virus infection. *Nature.* 2016;530: 108–112.  
716 doi:10.1038/nature16465
- 717 12. Nonnenmacher M, Weber T. Adeno-associated virus 2 infection requires  
718 endocytosis through the CLIC/GEEC pathway. *Cell Host & Microbe.* 2011;10: 563–  
719 576. doi:10.1016/j.chom.2011.10.014
- 720 13. Stahnke S, Lux K, Uhrig S, Kreppel F, Hösel M, Coutelle O, et al. Intrinsic  
721 phospholipase A2 activity of adeno-associated virus is involved in endosomal escape  
722 of incoming particles. *Virology.* 2011;409: 77–83. doi:10.1016/j.virol.2010.09.025

- 723 14. Qiu J, Brown KE. A 110-kDa nuclear shuttle protein, nucleolin, specifically binds  
724 to adeno-associated virus type 2 (AAV-2) capsid. *Virology*. 1999;257: 373–382.  
725 doi:10.1006/viro.1999.9664
- 726 15. Bevington JM, Needham PG, Verrill KC, Collaco RF, Basrur V, Trempe JP.  
727 Adeno-associated virus interactions with B23/Nucleophosmin: identification of sub-  
728 nucleolar virion regions. *Virology*. 2007;357: 102–113.  
729 doi:10.1016/j.virol.2006.07.050
- 730 16. Olson MO, Dundr M, Szebeni A. The nucleolus: an old factory with unexpected  
731 capabilities. *Trends in cell biology*. 2000;10: 189–196.
- 732 17. Hernandez-Verdun D, Roussel P, Gébrane-Younès J. Emerging concepts of  
733 nucleolar assembly. *Journal of cell science*. 2002;115: 2265–2270.
- 734 18. Yang K, Yang J, Yi J. Nucleolar Stress: hallmarks, sensing mechanism and  
735 diseases. *Cell Stress*. 2018;2: 125–140. doi:10.15698/cst2018.06.139
- 736 19. Boulon S, Westman BJ, Hutten S, Boisvert F-M, Lamond AI. The nucleolus under  
737 stress. *Molecular Cell*. 2010;40: 216–227. doi:10.1016/j.molcel.2010.09.024
- 738 20. Matthews D, Emmott E, Hiscox J. The Nucleolus. 2011; 321–345.  
739 doi:10.1007/978-1-4614-0514-6\_14
- 740 21. Salvetti A, Greco A. Viruses and the nucleolus: the fatal attraction. *Biochimica et*  
741 *biophysica acta*. 2014;1842: 840–847. doi:10.1016/j.bbadis.2013.12.010
- 742 22. Johnson JS, Samulski RJ. Enhancement of adeno-associated virus infection by  
743 mobilizing capsids into and out of the nucleolus. *Journal of Virology*. 2009;83: 2632–  
744 2644. doi:10.1128/jvi.02309-08

- 745 23. BUGLER B, CAIZERGUES-FERRER M, BOUCHE G, BOURBON H, AMALRIC  
746 F. Detection and Localization of a Class of Proteins Immunologically Related to a  
747 100-kDa Nucleolar Protein. *Eur J Biochem.* 1982;128: 475–480. doi:10.1111/j.1432-  
748 1033.1982.tb06989.x
- 749 24. Nicolson SC, Samulski RJ. Recombinant adeno-associated virus utilizes host cell  
750 nuclear import machinery to enter the nucleus. *Journal of Virology.* 2014;88: 4132–  
751 4144. doi:10.1128/jvi.02660-13
- 752 25. Bartlett JS, Wilcher R, Samulski RJ. Infectious entry pathway of adeno-  
753 associated virus and adeno-associated virus vectors. *Journal of Virology.* 2000;74:  
754 2777–2785.
- 755 26. Kelich JM, Ma J, Dong B, Wang Q, Chin M, Magura CM, et al. Super-resolution  
756 imaging of nuclear import of adeno-associated virus in live cells. *Mol Ther - Methods*  
757 *Clin Dev.* 2015;2: 15047. doi:10.1038/mtm.2015.47
- 758 27. Lux K, Goerlitz N, Schlemminger S, Perabo L, Goldnau D, Endell J, et al. Green  
759 fluorescent protein-tagged adeno-associated virus particles allow the study of  
760 cytosolic and nuclear trafficking. *Journal of Virology.* 2005;79: 11776–11787.  
761 doi:10.1128/jvi.79.18.11776-11787.2005
- 762 28. Bartlett JS, Wilcher R, Samulski RJ. Infectious entry pathway of adeno-  
763 associated virus and adeno-associated virus vectors. *Journal of Virology.* 2000;74:  
764 2777–2785.
- 765 29. Xiao W, Warrington KH, Hearing P, Hughes J, Muzyczka N. Adenovirus-  
766 Facilitated Nuclear Translocation of Adeno-Associated Virus Type 2. *J Virol.* 2002;76:  
767 11505–11517. doi:10.1128/jvi.76.22.11505-11517.2002

- 768 30. Sipo I, Fechner H, Pinkert S, Suckau L, Wang X, Weger S, et al. Differential  
769 internalization and nuclear uncoating of self-complementary adeno-associated virus  
770 pseudotype vectors as determinants of cardiac cell transduction. *Gene Ther.*  
771 2007;14: 1319–1329. doi:10.1038/sj.gt.3302987
- 772 31. Zhong L, Li W, Yang Z, Qing K, Tan M, Hansen J, et al. Impaired Nuclear  
773 Transport and Uncoating Limit Recombinant Adeno-Associated Virus 2 Vector-  
774 Mediated Transduction of Primary Murine Hematopoietic Cells. *Hum Gene Ther.*  
775 2004;15: 1207–1218. doi:10.1089/hum.2004.15.1207
- 776 32. Wistuba A, Kern A, Weger S, Grimm D, Kleinschmidt JA. Subcellular  
777 compartmentalization of adeno-associated virus type 2 assembly. *J Virol.* 1997;71:  
778 1341–1352. doi:10.1128/jvi.71.2.1341-1352.1997
- 779 33. Girod A, Wobus CE, Zádori Z, Ried M, Leike K, Tijssen P, et al. The VP1 capsid  
780 protein of adeno-associated virus type 2 is carrying a phospholipase A2 domain  
781 required for virus infectivity. *The Journal of general virology.* 2002;83: 973–978.  
782 doi:10.1099/0022-1317-83-5-973
- 783 34. Rayaprolu V, Kruse S, Kant R, Venkatakrishnan B, Movahed N, Brooke D, et al.  
784 Comparative Analysis of Adeno-Associated Virus Capsid Stability and Dynamics. *J*  
785 *Virol.* 2013;87: 13150–13160. doi:10.1128/jvi.01415-13
- 786 35. Roukos V, Pegoraro G, Voss TC, Misteli T. Cell cycle staging of individual cells  
787 by fluorescence microscopy. *Nature protocols.* 2015;10: 334–348.  
788 doi:10.1038/nprot.2015.016



- 789 36. Latonen L. Phase-to-Phase With Nucleoli – Stress Responses, Protein  
790 Aggregation and Novel Roles of RNA. *Front Cell Neurosci.* 2019;13: 151.  
791 doi:10.3389/fncel.2019.00151
- 792 37. Ahmad Y, Boisvert F-M, Gregor P, Cobley A, Lamond AI. NOPdb: Nucleolar  
793 Proteome Database—2008 update. *Nucleic Acids Res.* 2009;37: D181–D184.  
794 doi:10.1093/nar/gkn804
- 795 38. Lindström MS, Jurada D, Bursac S, Orsolich I, Bartek J, Volarevic S. Nucleolus as  
796 an emerging hub in maintenance of genome stability and cancer pathogenesis.  
797 *Oncogene.* 2018;37: 2351–2366. doi:10.1038/s41388-017-0121-z
- 798 39. Hiscox JA. The nucleolus – a gateway to viral infection? *Arch Virol.* 2002;147:  
799 1077–1089. doi:10.1007/s00705-001-0792-0
- 800 40. Hiscox JA. RNA viruses: hijacking the dynamic nucleolus. *Nat Rev Microbiol.*  
801 2007;5: 119–127. doi:10.1038/nrmicro1597
- 802 41. Callé A, Ugrinova I, Epstein AL, Bouvet P, Diaz J-J, Greco A. Nucleolin is  
803 required for an efficient herpes simplex virus type 1 infection. *Journal of Virology.*  
804 2008;82: 4762–4773. doi:10.1128/jvi.00077-08
- 805 42. Hindley CE, Davidson AD, Matthews DA. Relationship between adenovirus DNA  
806 replication proteins and nucleolar proteins B23.1 and B23.2. *J Gen Virology.*  
807 2007;88: 3244–3248. doi:10.1099/vir.0.83196-0
- 808 43. Lawrence FJ, McStay B, Matthews DA. Nucleolar protein upstream binding factor  
809 is sequestered into adenovirus DNA replication centres during infection without

- 810 affecting RNA polymerase I location or ablating rRNA synthesis. *J Cell Sci.* 2006;119:  
811 2621–2631. doi:10.1242/jcs.02982
- 812 44. Okuwaki M, Iwamatsu A, Tsujimoto M, Nagata K. Identification of  
813 nucleophosmin/B23, an acidic nucleolar protein, as a stimulatory factor for in vitro  
814 replication of adenovirus DNA complexed with viral basic core proteins<sup>11</sup> Edited by T.  
815 Richmond. *J Mol Biol.* 2001;311: 41–55. doi:10.1006/jmbi.2001.4812
- 816 45. Walton TH, Moen PT, Fox E, Bodnar JW. Interactions of minute virus of mice and  
817 adenovirus with host nucleoli. *J Virol.* 1989;63: 3651–3660.  
818 doi:10.1128/jvi.63.9.3651-3660.1989
- 819 46. Moen PT, Fox E, Bodnar JW. Adenovirus and minute virus of mice DNAs are  
820 localized at the nuclear periphery. *Nucleic Acids Res.* 1990;18: 513–520.  
821 doi:10.1093/nar/18.3.513
- 822 47. Pyper JM, Clements JE, Zink MC. The nucleolus is the site of Borna disease  
823 virus RNA transcription and replication. *Journal of Virology.* 1998;72: 7697–7702.
- 824 48. Michienzi A, Cagnon L, Bahner I, Rossi JJ. Ribozyme-mediated inhibition of HIV  
825 1 suggests nucleolar trafficking of HIV-1 RNA. *Proc National Acad Sci.* 2000;97:  
826 8955–8960. doi:10.1073/pnas.97.16.8955
- 827 49. Mori Y, Okabayashi T, Yamashita T, Zhao Z, Wakita T, Yasui K, et al. Nuclear  
828 Localization of Japanese Encephalitis Virus Core Protein Enhances Viral  
829 Replication†. *J Virol.* 2005;79: 3448–3458. doi:10.1128/jvi.79.6.3448-3458.2005

- 830 50. Fazakerley JK, Boyd A, Mikkola ML, Kääriäinen L. A Single Amino Acid Change  
831 in the Nuclear Localization Sequence of the nsP2 Protein Affects the Neurovirulence  
832 of Semliki Forest Virus. *J Virol.* 2002;76: 392–396. doi:10.1128/jvi.76.1.392-396.2002
- 833 51. Grieger JC, Snowdy S, Samulski RJ. Separate Basic Region Motifs within the  
834 Adeno-Associated Virus Capsid Proteins Are Essential for Infectivity and Assembly. *J*  
835 *Virol.* 2006;80: 5199–5210. doi:10.1128/jvi.02723-05
- 836 52. Sonntag F, Bleker S, Leuchs B, Fischer R, Kleinschmidt JA. Adeno-associated  
837 virus type 2 capsids with externalized VP1/VP2 trafficking domains are generated  
838 prior to passage through the cytoplasm and are maintained until uncoating occurs in  
839 the nucleus. *Journal of Virology.* 2006;80: 11040–11054. doi:10.1128/jvi.01056-06
- 840 53. Bernaud J, Rossi A, Fis A, Gardette L, Aillot L, Büning H, et al. Characterization  
841 of AAV vector particle stability at the single-capsid level. *J Biol Phys.* 2018;44: 181–  
842 194. doi:10.1007/s10867-018-9488-5
- 843 54. Laredj LN, Beard P. Adeno-Associated Virus Activates an Innate Immune  
844 Response in Normal Human Cells but Not in Osteosarcoma Cells. *J Virol.* 2011;85:  
845 13133–13143. doi:10.1128/jvi.05407-11
- 846 55. Fan Y, Sanyal S, Bruzzone R. Breaking Bad: How Viruses Subvert the Cell  
847 Cycle. *Front Cell Infect Mi.* 2018;8: 396. doi:10.3389/fcimb.2018.00396
- 848 56. Auewarakul P, Wacharapornin P, Srichatrapimuk S, Chutipongtanate S,  
849 Puthavathana P. Uncoating of HIV-1 requires cellular activation. *Virology.* 2005;337:  
850 93–101. doi:10.1016/j.virol.2005.02.028

- 851 57. Berka U, Hamann MV, Lindemann D. Early Events in Foamy Virus—Host  
852 Interaction and Intracellular Trafficking. *Viruses*. 2013;5: 1055–1074.  
853 doi:10.3390/v5041055
- 854 58. Lapeyre B, Bourbon H, Amalric F. Nucleolin, the major nucleolar protein of  
855 growing eukaryotic cells: an unusual protein structure revealed by the nucleotide  
856 sequence. *Proc National Acad Sci*. 1987;84: 1472–1476.  
857 doi:10.1073/pnas.84.6.1472
- 858 59. Franzoso FD, Seyffert M, Vogel R, Yakimovich A, Pereira B de A, Meier AF, et al.  
859 Cell Cycle-Dependent Expression of Adeno-Associated Virus 2 (AAV2) Rep in  
860 Coinfections with Herpes Simplex Virus 1 (HSV-1) Gives Rise to a Mosaic of Cells  
861 Replicating either AAV2 or HSV-1. *Journal of Virology*. 2017;91.  
862 doi:10.1128/jvi.00357-17
- 863 60. Zhang L, Rossi A, Lange L, Meumann N, Koitzsch U, Christie K, et al. Capsid  
864 Engineering Overcomes Barriers Toward Adeno-Associated Virus Vector-Mediated  
865 Transduction of Endothelial Cells. *Hum Gene Ther*. 2019;30: 1284–1296.  
866 doi:10.1089/hum.2019.027
- 867 61. Samulski RJ, Chang LS, Shenk T. A recombinant plasmid from which an  
868 infectious adeno-associated virus genome can be excised in vitro and its use to study  
869 viral replication. *J Virol*. 1987;61: 3096–3101. doi:10.1128/jvi.61.10.3096-3101.1987
- 870 62. Roukos V, Pegoraro G, Voss TC, Misteli T. Cell cycle staging of individual cells  
871 by fluorescence microscopy. *Nat Protoc*. 2015;10: 334–348.  
872 doi:10.1038/nprot.2015.016
- 873

## 874 **Supporting information**

875 **S1 Fig. Endosomal escape is relevant for nucleolar accumulation.** NHF cells  
876 were either mock-infected or infected with wtAAV2 or a VP1 AAV2 mutant  
877 (<sup>76</sup>HD/AN) at a MOI of 20`000. At 5 hpi, the samples were processed for IF-FISH  
878 and CLSM. Intact capsids were stained using an antibody that detects a  
879 conformational capsid epitope (green). AAV2 DNA (red) was detected with an Alexa  
880 Fluor (AF) 647 labeled, amine-modified DNA probe that binds to the AAV2 genome.  
881 Nuclei were counterstained with DAPI (blue).

882

883 **S2 Fig. Co-detection of AAV2 DNA with AAV2 capsids and AAV2 capsid**  
884 **proteins in Vero cells.** Vero cells were infected with wtAAV2 (MOI 20`000). At 24  
885 hpi, the cells were fixed and processed for multicolor IF analysis combined with  
886 FISH and CLSM. Intact capsids (green) or capsid proteins (yellow) were detected  
887 using either an antibody against intact AAV2 capsids (conformational capsid  
888 epitope) or an antibody (linear epitope) against VP1, VP2 and VP3. AAV2 DNA (red)  
889 was detected with an Alexa Fluor (AF) 647 labeled, amine-modified DNA probe that  
890 binds to the AAV2 genome. Nuclei were counterstained with DAPI (blue).

891

892 **S3 Fig. AAV2 infection does not alter the ratio of dense to dispersed nucleoli.**  
893 NHF cells were mock-infected or infected with wtAAV2 (MOI 20`000) and 24 h later  
894 processed for combined IF-FISH, CLSM and quantification of the nucleolar structure  
895 of 100 individual nuclei in mock- or AAV2 infected cells. p-values were calculated  
896 using an unpaired Student's t-test (\* -  $p \leq 0.05$ , \*\* -  $p \leq 0.01$ , \*\*\* -  $p \leq 0.001$ ,  
897 \*\*\*\* -  $p \leq 0.0001$ ).

898

899 **S4 Fig. Schematic representation of the cell cycle staging by cyclin A staining**

900 **and the integrated intensity of DAPI.** (1) The background of each image was

901 subtracted. (2) Nuclei and cyclin A stainings were identified as primary objects in

902 CellProfiler. (3) The stainings were related to each other and (4) the DAPI integrated

903 intensity of each nucleus was measured. (5) Histograms of the DAPI integrated

904 intensities were plotted using an automated script in Matlab and visual thresholds

905 were set. (6) Cells were classified in CellProfiler using the visual thresholds obtained

906 in step 5. (7) The classification of each nucleus into G1, S or G2 was overlaid on

907 the original DAPI image to track individual cells.

908

909 **S5 Fig. Cell cycle staging of DAPI stained cells using flow cytometry analysis**

910 **and confocal laser scanning microscopy.** NHF cells were synchronized using a

911 double thymidine (3 mM) block. After the release, the cells were either mock-treated

912 or treated with nocodazole (200 nM) for 24 hours to induce a G2 cell cycle phase

913 arrest. Flow cytometry shows the mean value of three experiments, each replicate

914 contains at least 5`000 scored events. CLSM analysis shows the mean value of three

915 experiments, each replicate contains at least 100 individual analyzed cells. p-values

916 were calculated using an unpaired Student's t-test (\* -  $p \leq 0.05$ , \*\* -  $p \leq 0.01$ ,

917 \*\*\* -  $p \leq 0.001$ , \*\*\*\* -  $p \leq 0.0001$ ).

918

919 **S6 Fig. Nucleolar reorganization during cell cycle progression.** Image-based

920 analysis of the ratios of dense to dispersed nucleoli of 150 individual cells in different

921 cell cycle phases (G1, S and G2). Statistical analysis was performed on three

922 independent experiments and p-values were calculated using an unpaired Student's

923 t-test (\* -  $p \leq 0.05$ , \*\* -  $p \leq 0.01$ , \*\*\* -  $p \leq 0.001$ , \*\*\*\* -  $p \leq 0.0001$ ).

924

925 **S7 Fig. Capsid disassembly coincides with cell cycle progression in HDFn**

926 **cells.** HDFn cells were infected with wtAAV2 (MOI 20`000). At 24 hpi, the cells were  
927 fixed and processed for multicolor IF analysis combined with FISH, CLSM. (A) Intact  
928 capsids (green) or capsid proteins (yellow) were detected using either an antibody  
929 against intact AAV2 capsids (conformational capsid epitope) or an antibody (linear  
930 epitope) against VP1, VP2 and VP3. AAV2 DNA (magenta) was detected with an  
931 Alexa Fluor (AF) 647 labeled, amine-modified DNA probe that binds to the AAV2  
932 genome. Nuclei were counterstained with DAPI and illustrated as white lines. (B)  
933 Quantification of at least 50 nuclei positive for intact AAV2 capsids or capsid proteins  
934 during cell cycle progression.

935

936 **S8 Fig. Helper virus-supported AAV2 DNA replication occurs in nuclear**  
937 **replication compartments that are distinctly separate from nucleoli.** NHF cells

938 were mock-infected or infected with wtAAV2 (MOI 10`000), HSV-1 (MOI 0.5) or co-  
939 infected with wtAAV2 (MOI 5`000) and HSV-1 (MOI 0.5). At 12 hpi, the cells were  
940 fixed and processed for multicolor IF analysis combined with FISH and CLSM.  
941 Nucleoli (Nuc) were visualized using an antibody against fibrillarin (yellow). wtAAV2  
942 replication compartments were stained using a primary antibody specific for the  
943 AAV2 Rep proteins (green). AAV2 DNA (red) was detected with an Alexa Fluor (AF)  
944 647 labeled, amine-modified DNA probe that binds to the AAV2 genome. Nuclei  
945 were counterstained with DAPI and illustrated as blue lines.

946

947 **S1 Movie. Maximum intensity projection of AAV2 genome positive nucleoli.**

948 NHF cells were infected with wtAAV2 (MOI 20`000). At 24 hpi, the cells were fixed  
949 and processed for multicolor IF analysis combined with FISH and CLSM. Nucleoli  
950 were visualized using an antibody against fibrillarin (yellow). Intact capsids were

951 stained using an antibody that detects a conformational capsid epitope (green).  
952 AAV2 DNA (red) was detected with an Alexa Fluor (AF) 647 labeled, amine-modified  
953 DNA probe that binds to the AAV2 genome. Reconstructions were generated using  
954 Imaris V.9.6.



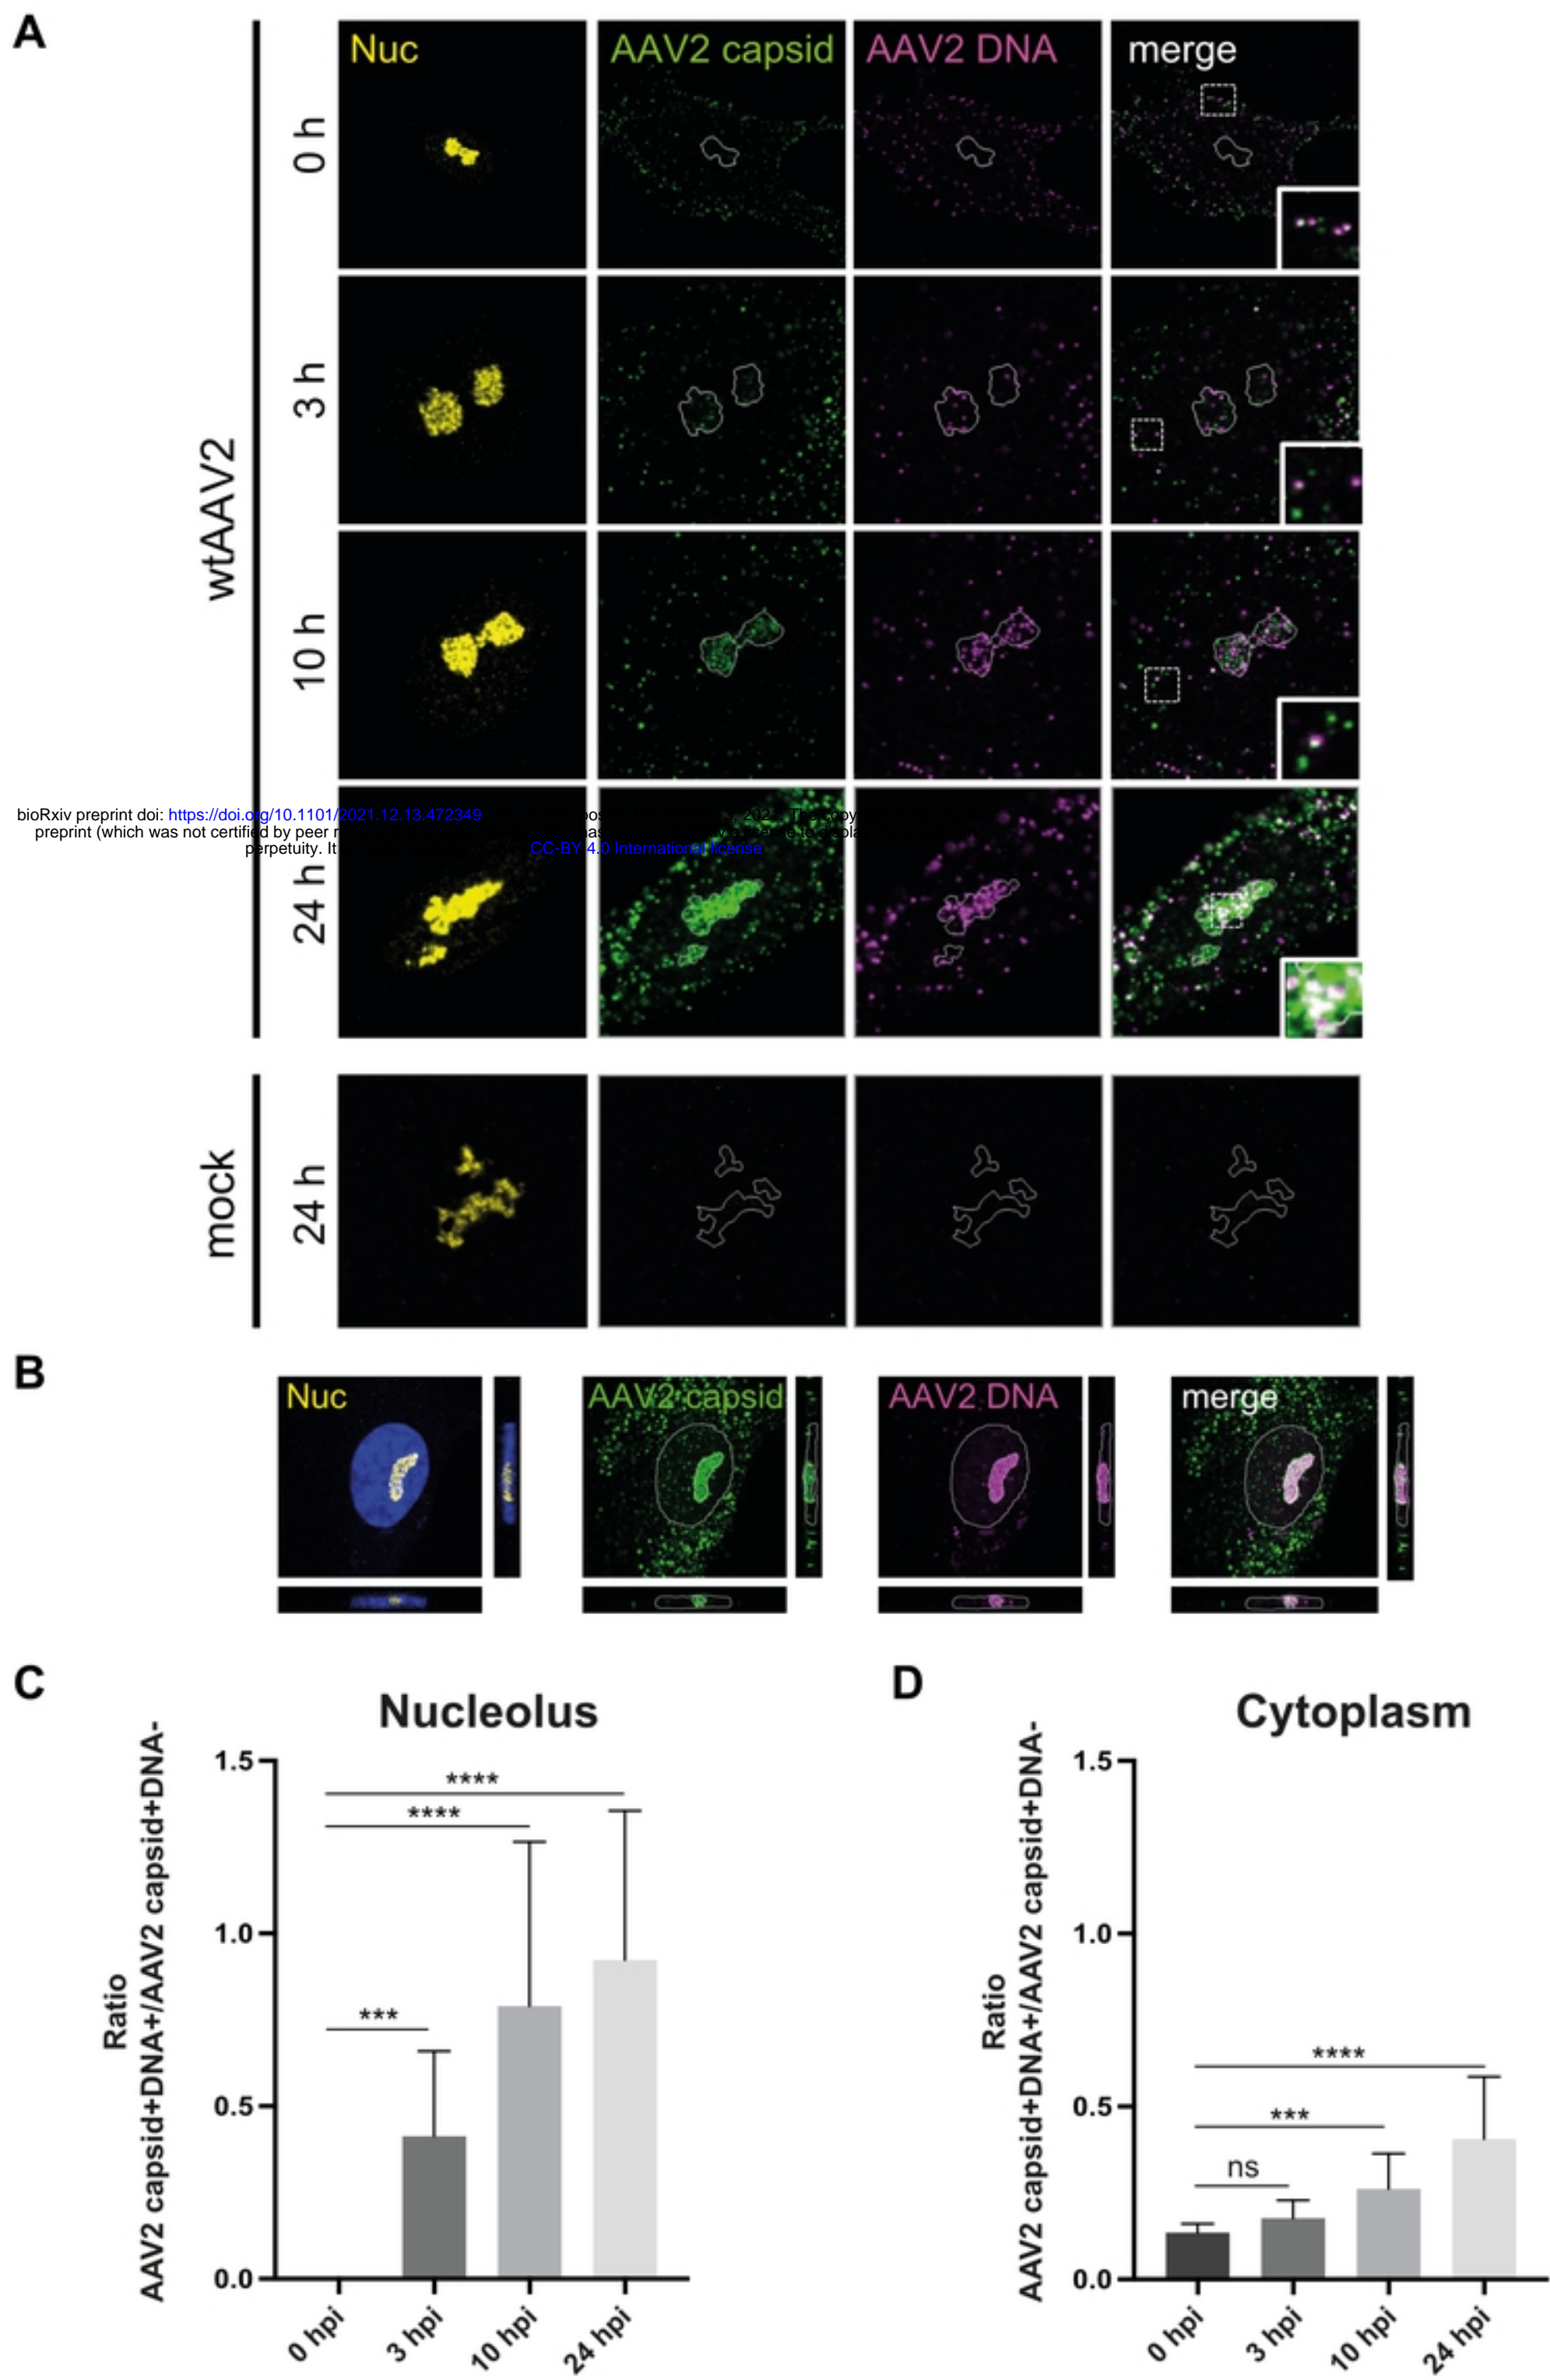

Fig1

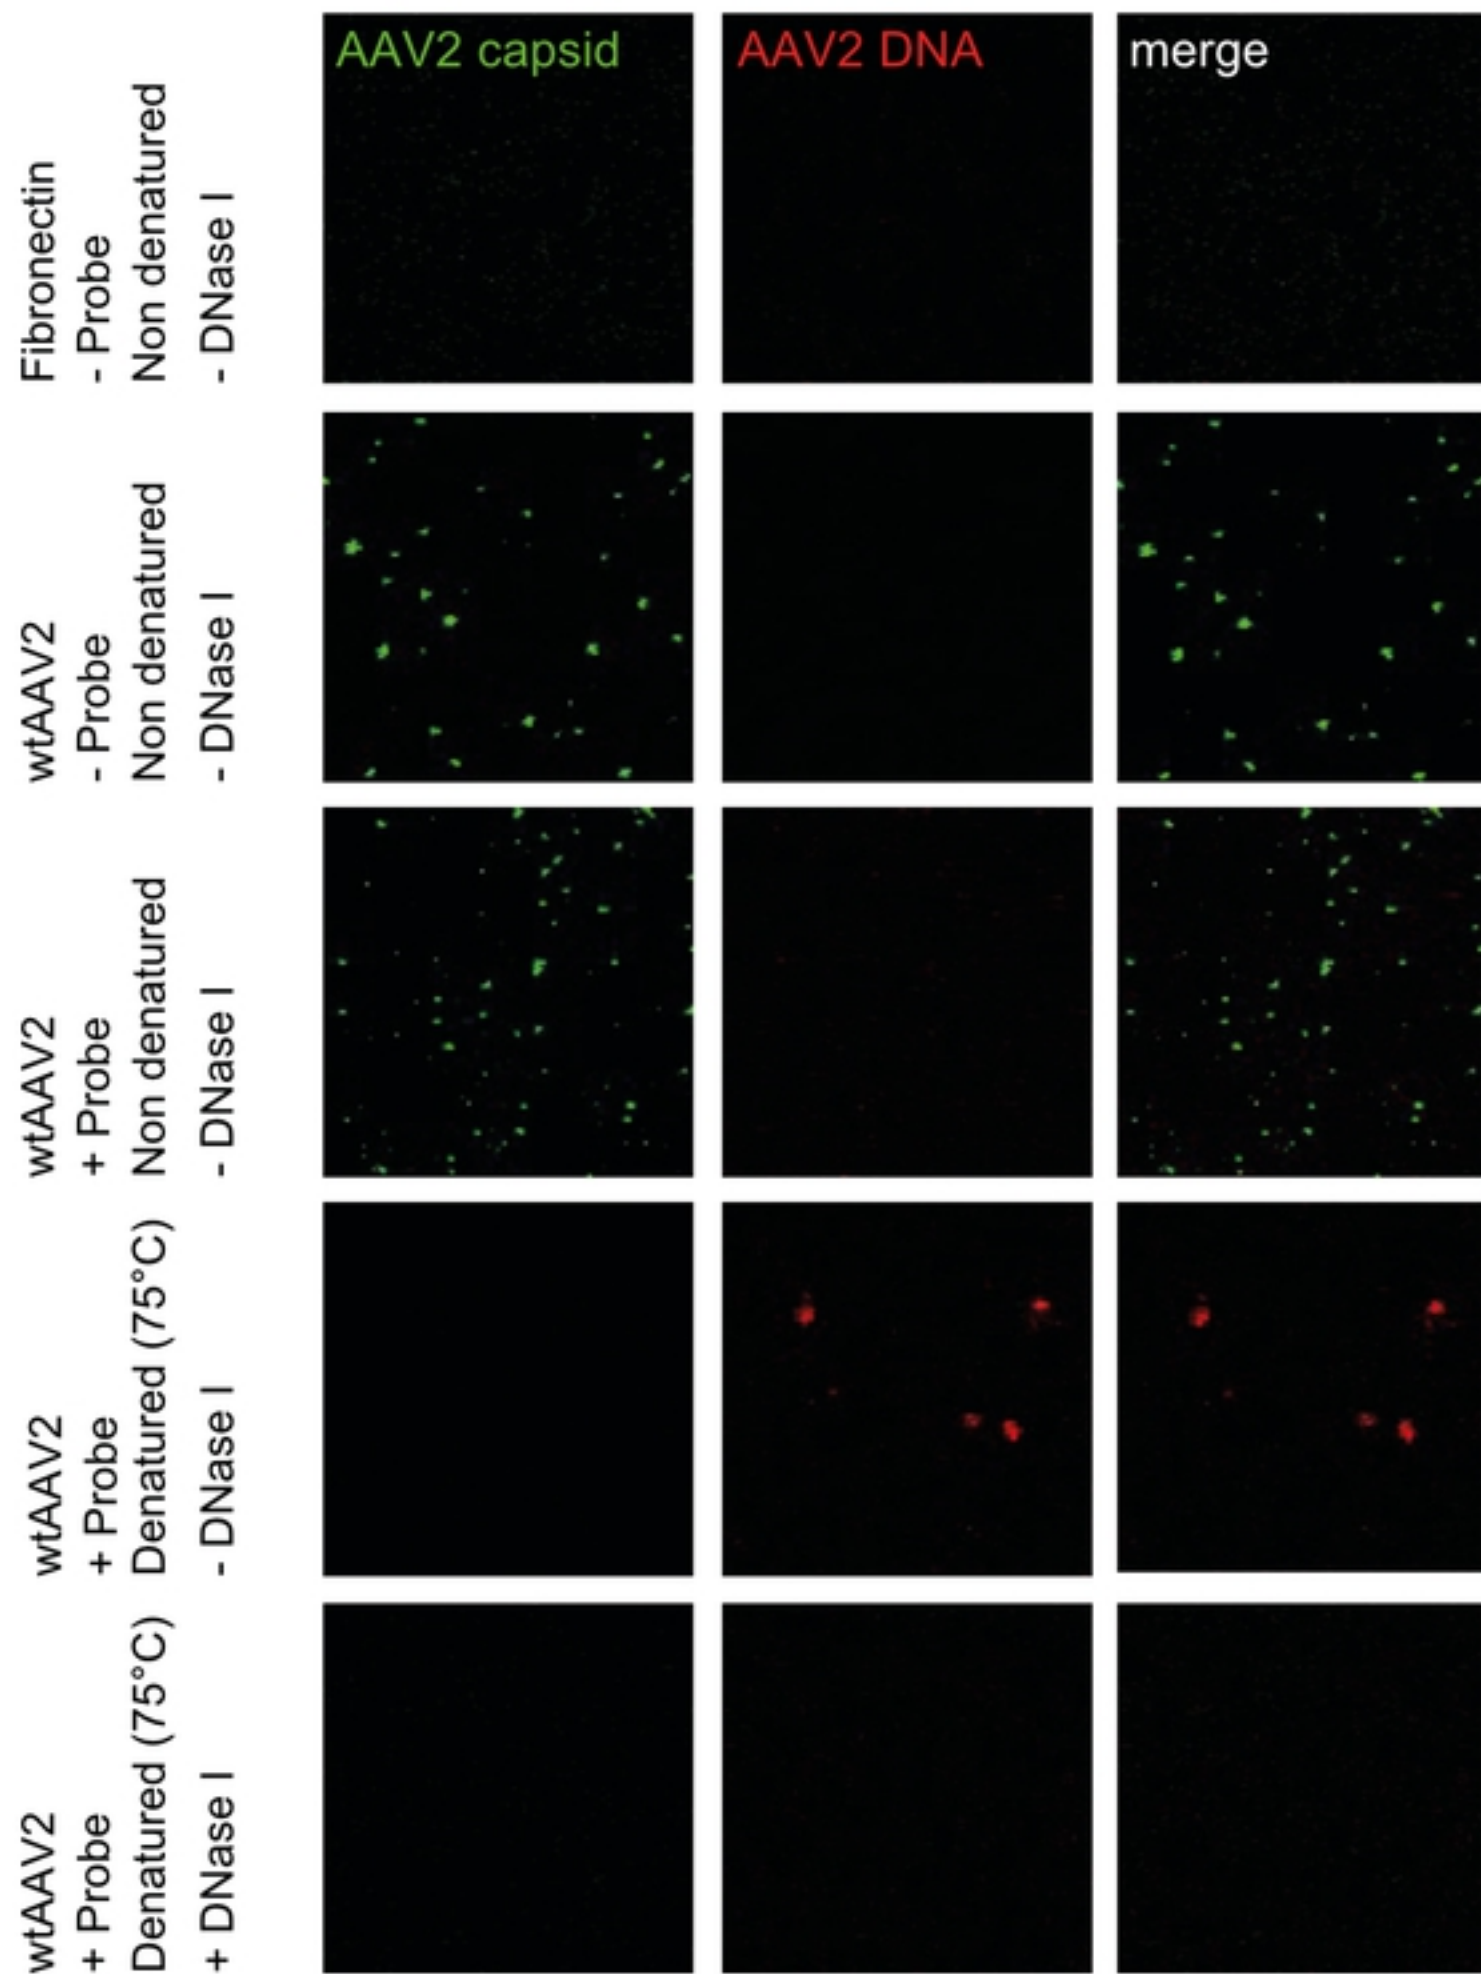

**B**

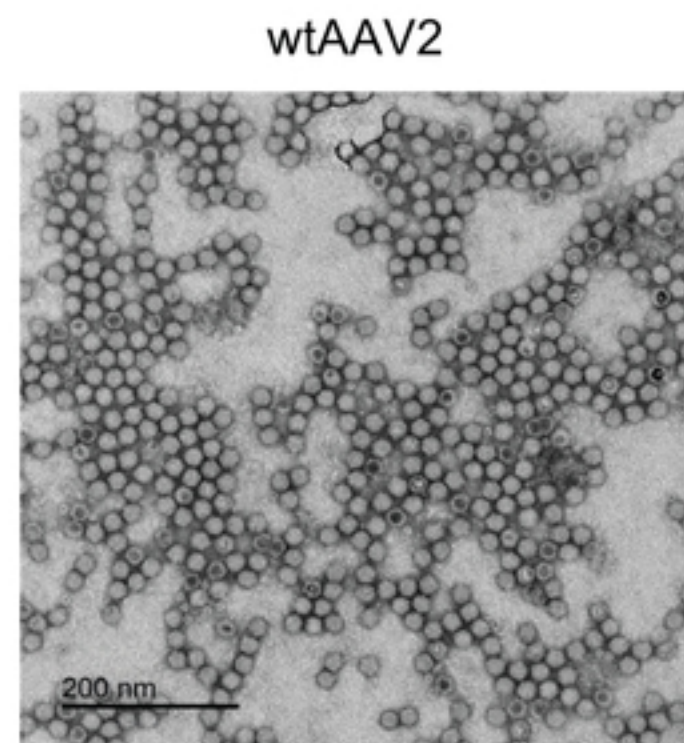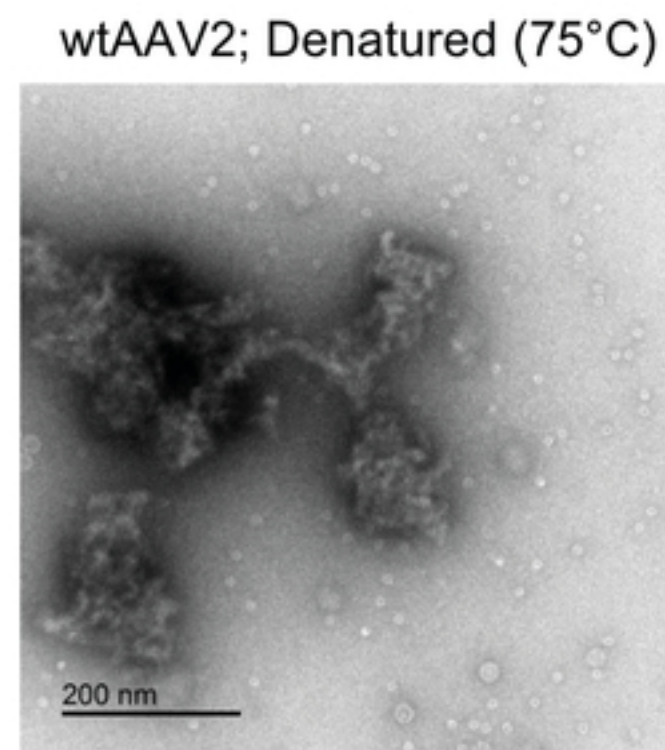

**A**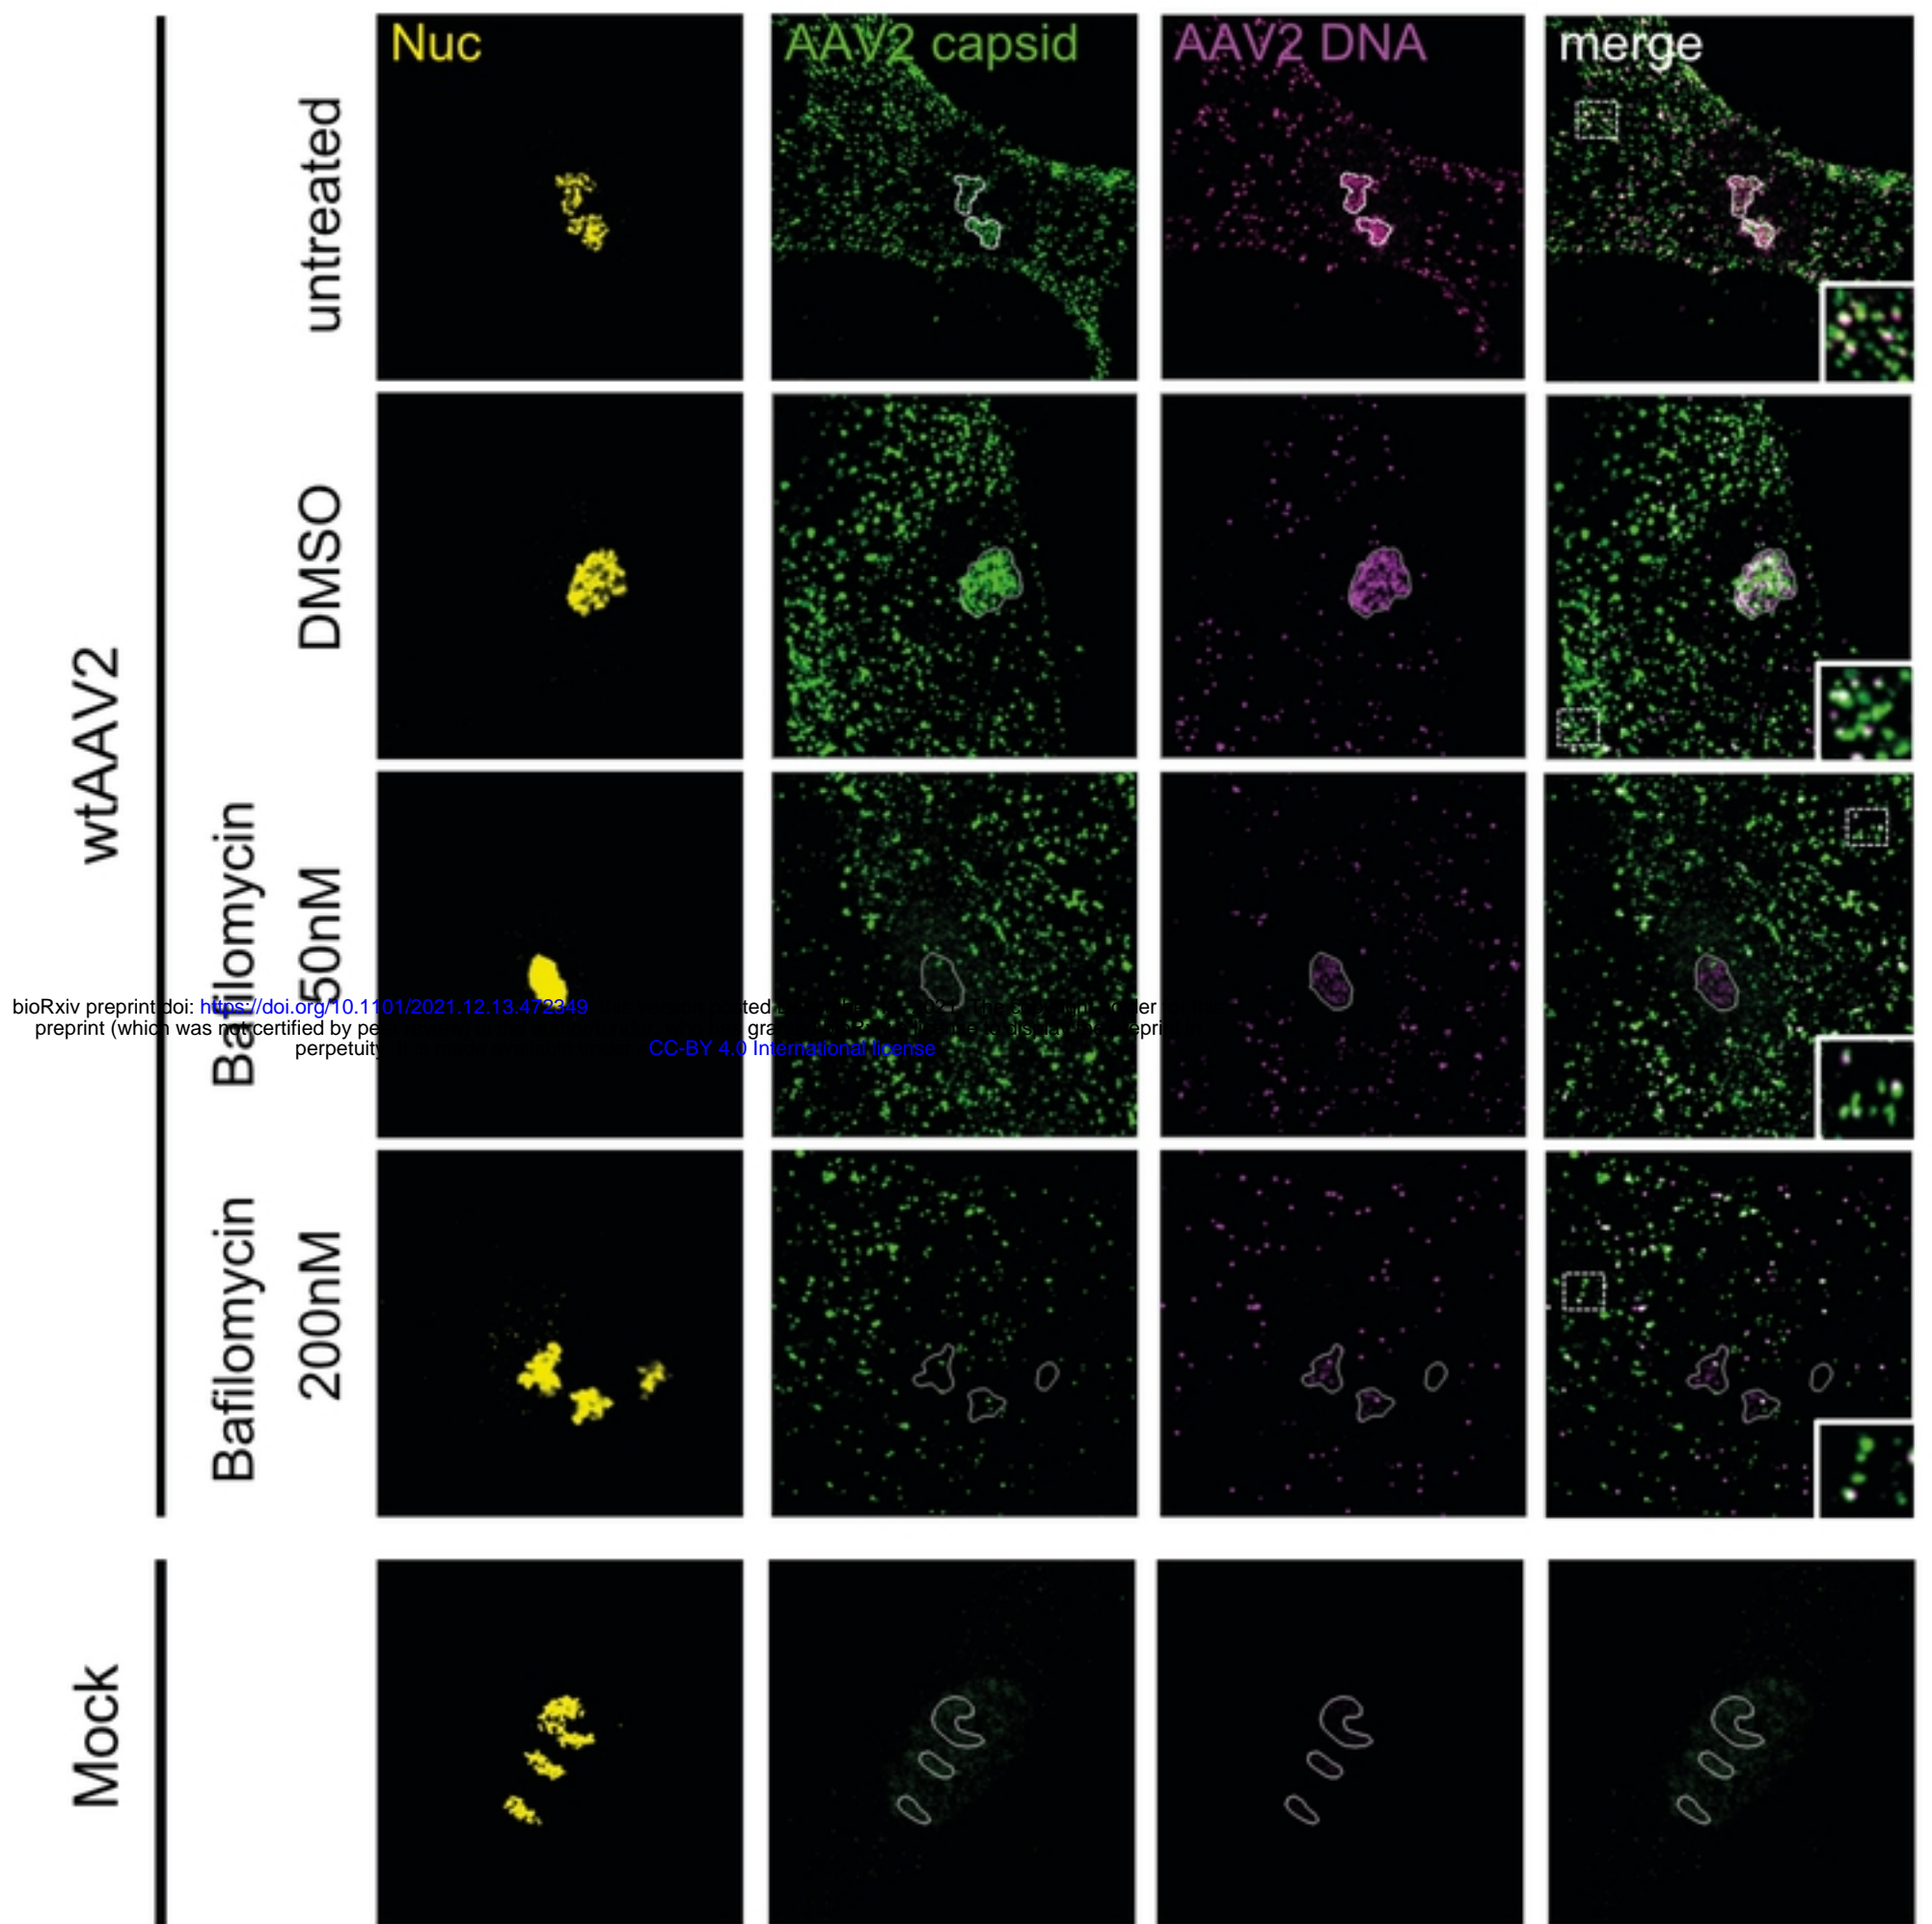**B**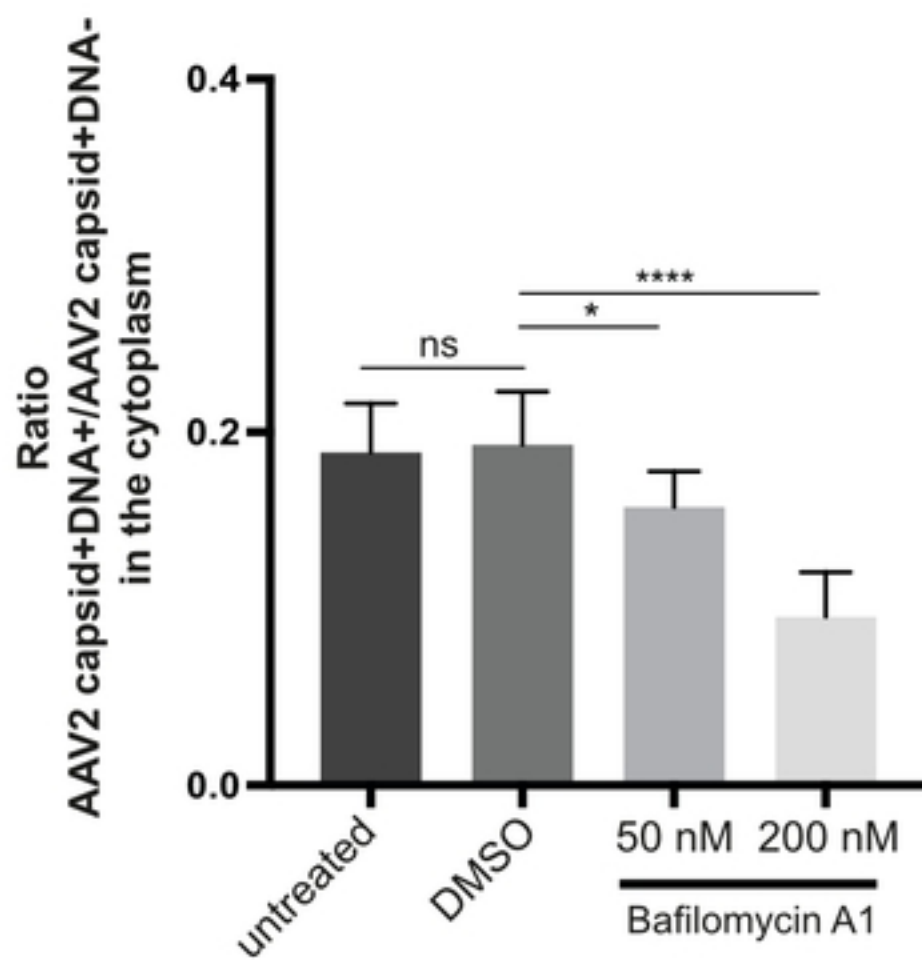**C**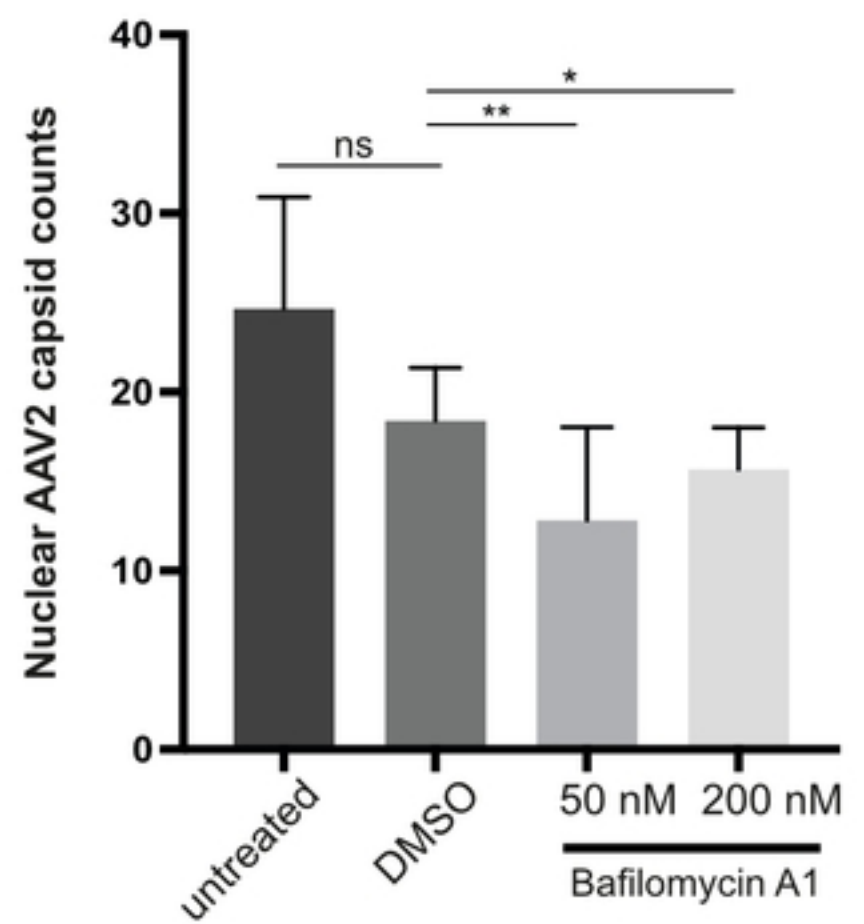

Fig3

**A**

bioRxiv preprint doi: <https://doi.org/10.1101/2021.12.13.472349>; this version posted December 13, 2021. The copyright holder for this preprint (which was not certified by peer review) is the author/funder, who has granted bioRxiv a license to display the preprint in perpetuity. It is made available under aCC-BY 4.0 International license.

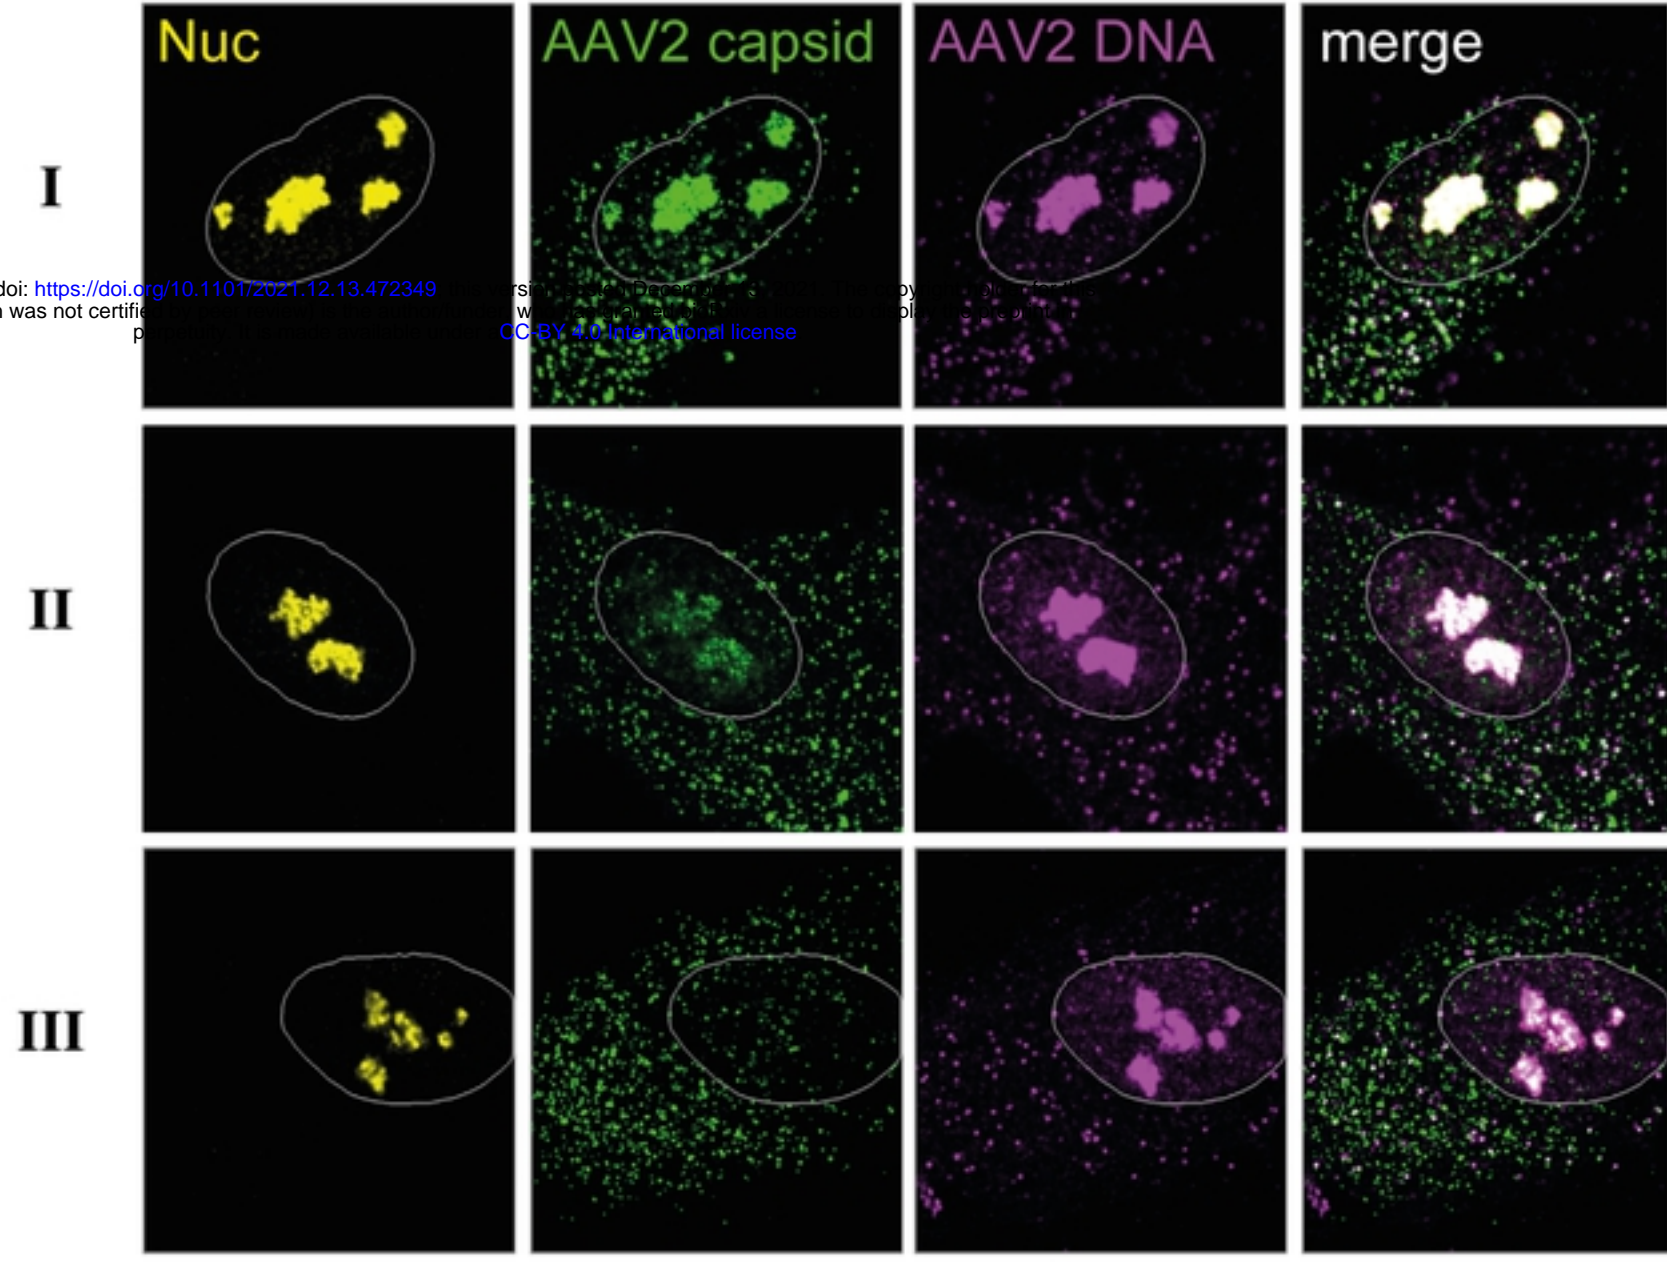**B**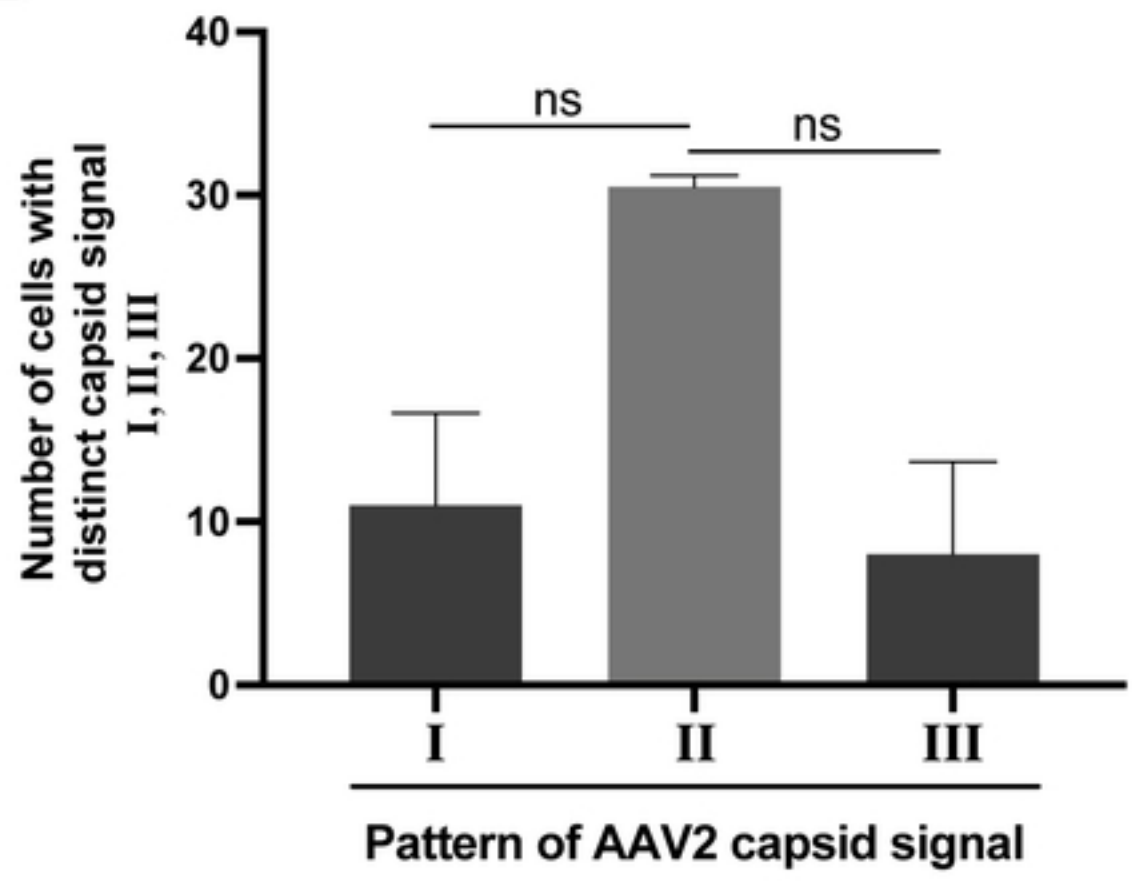**C**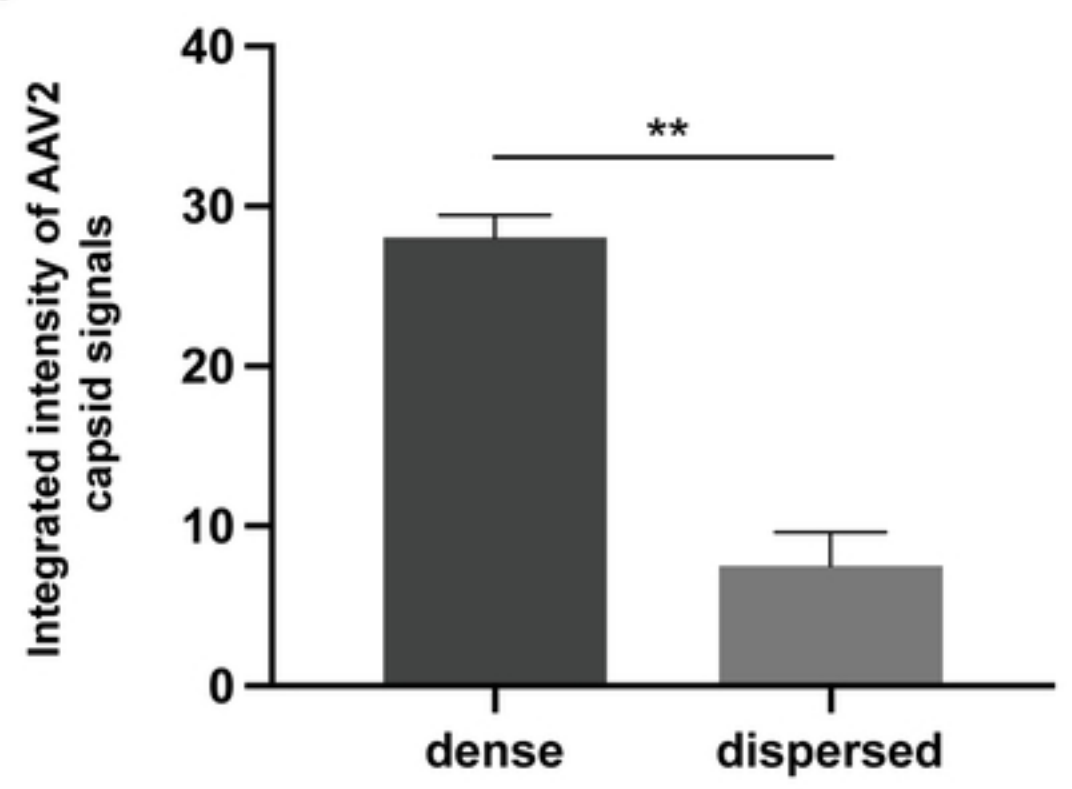

Fig4

**A**

bioRxiv preprint doi: <https://doi.org/10.1101/2021.12.13.472349>; this version posted December 13, 2021. The copyright holder for this preprint (which was not certified by peer review) is the author/funder, who has granted bioRxiv a license to display the preprint in perpetuity. It is made available under aCC-BY 4.0 International license.

**wtAAV2**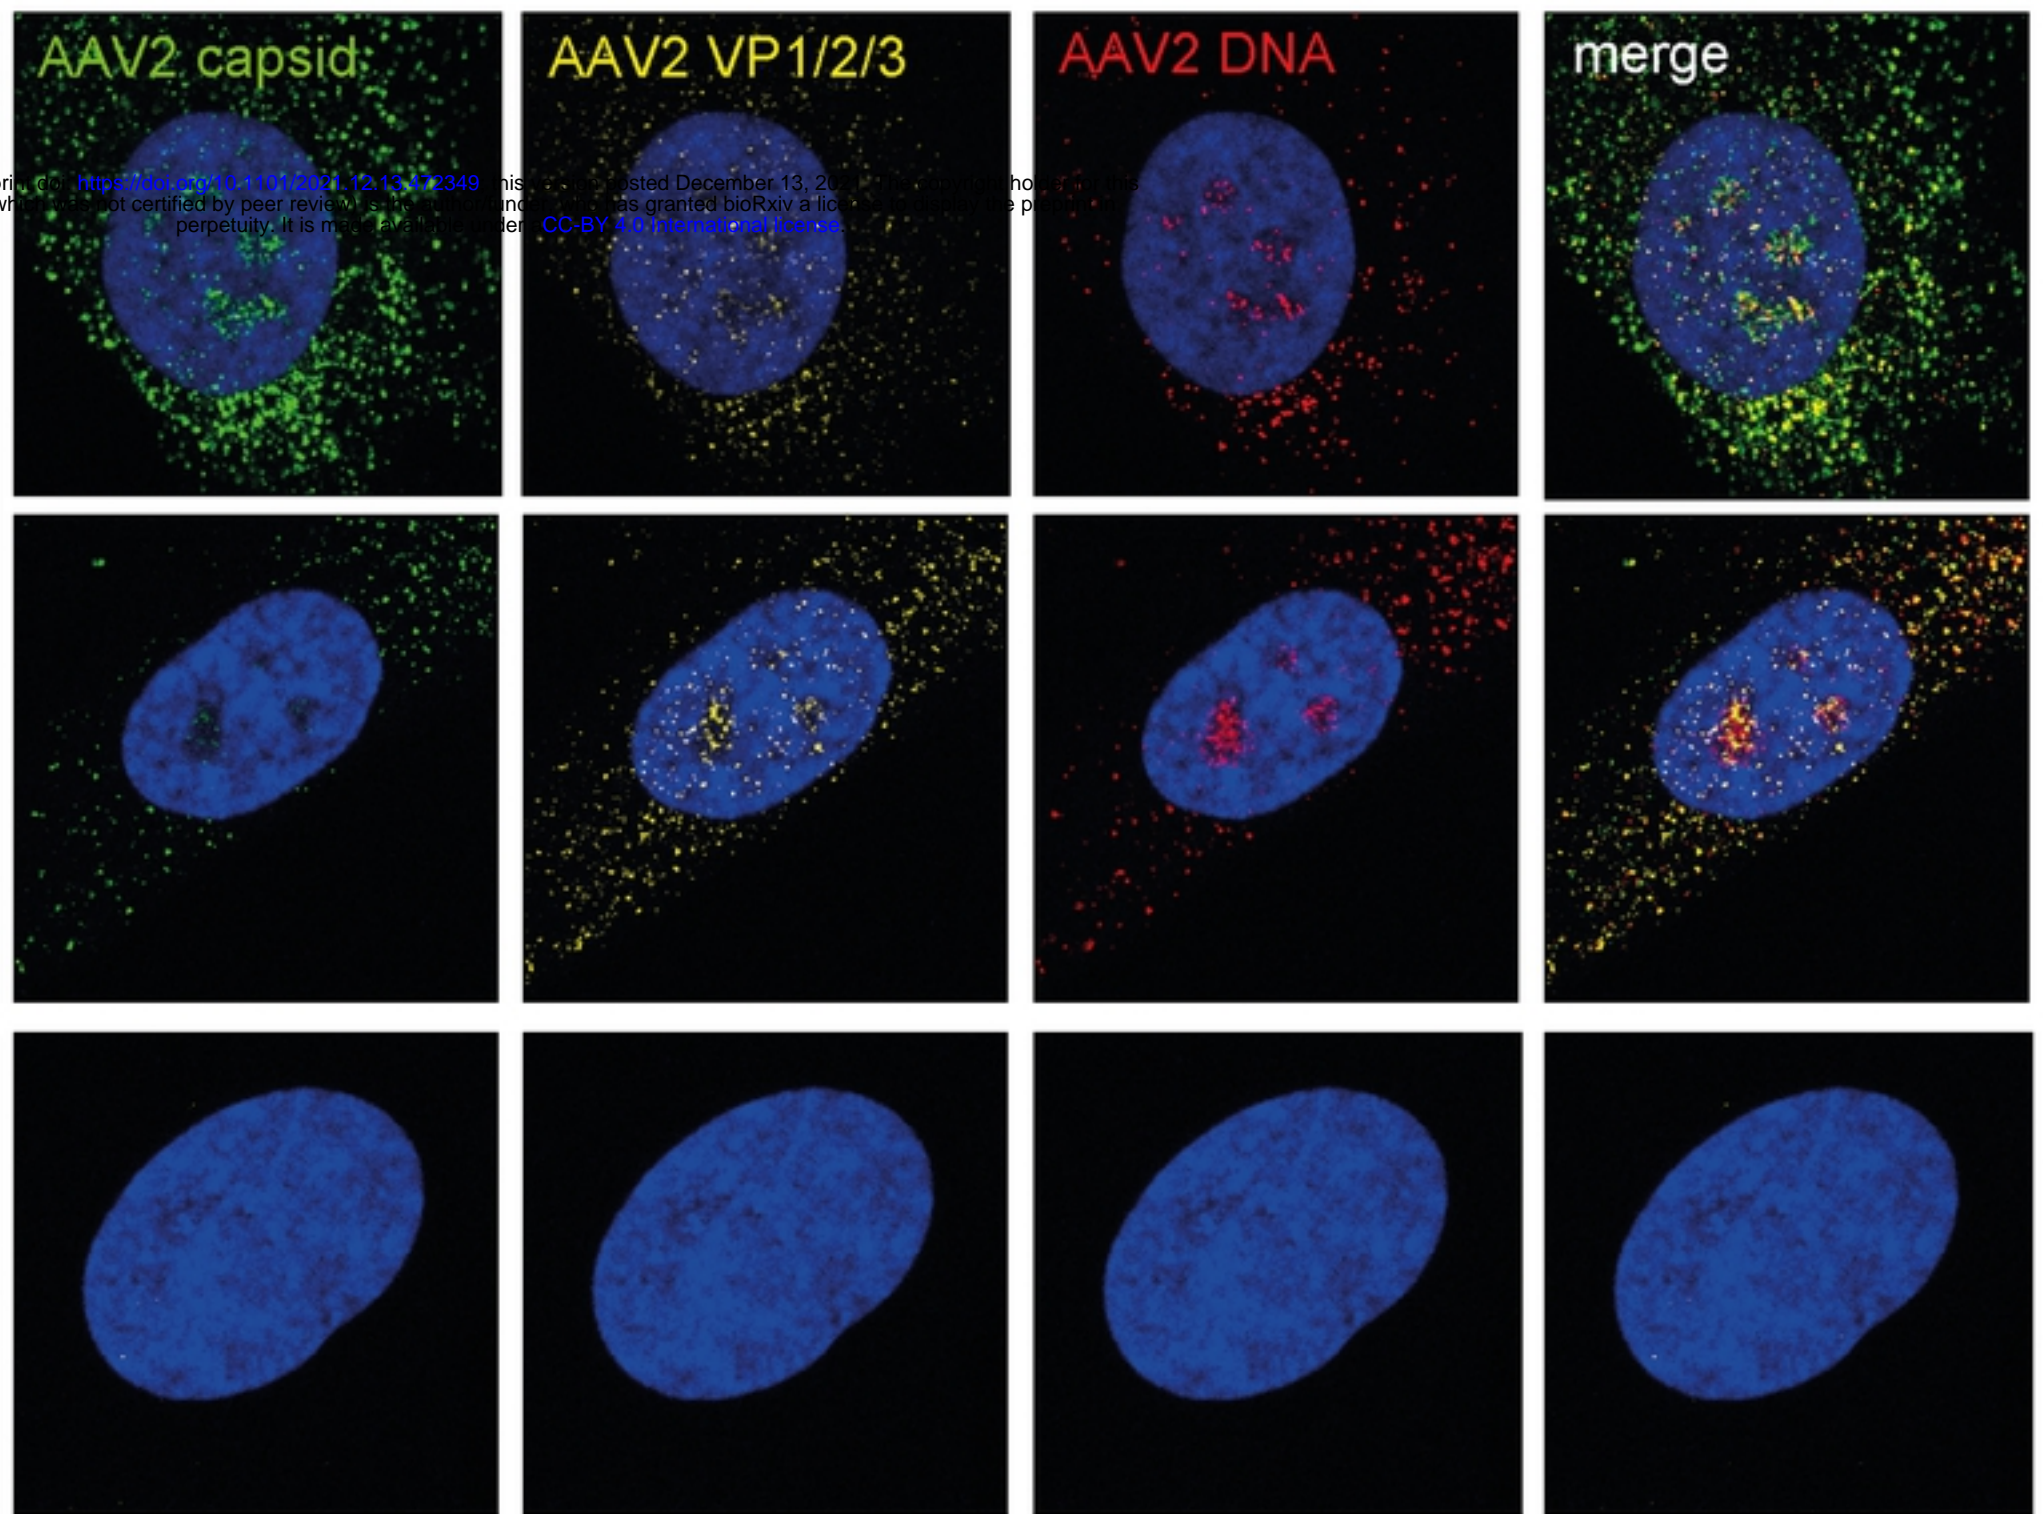**B**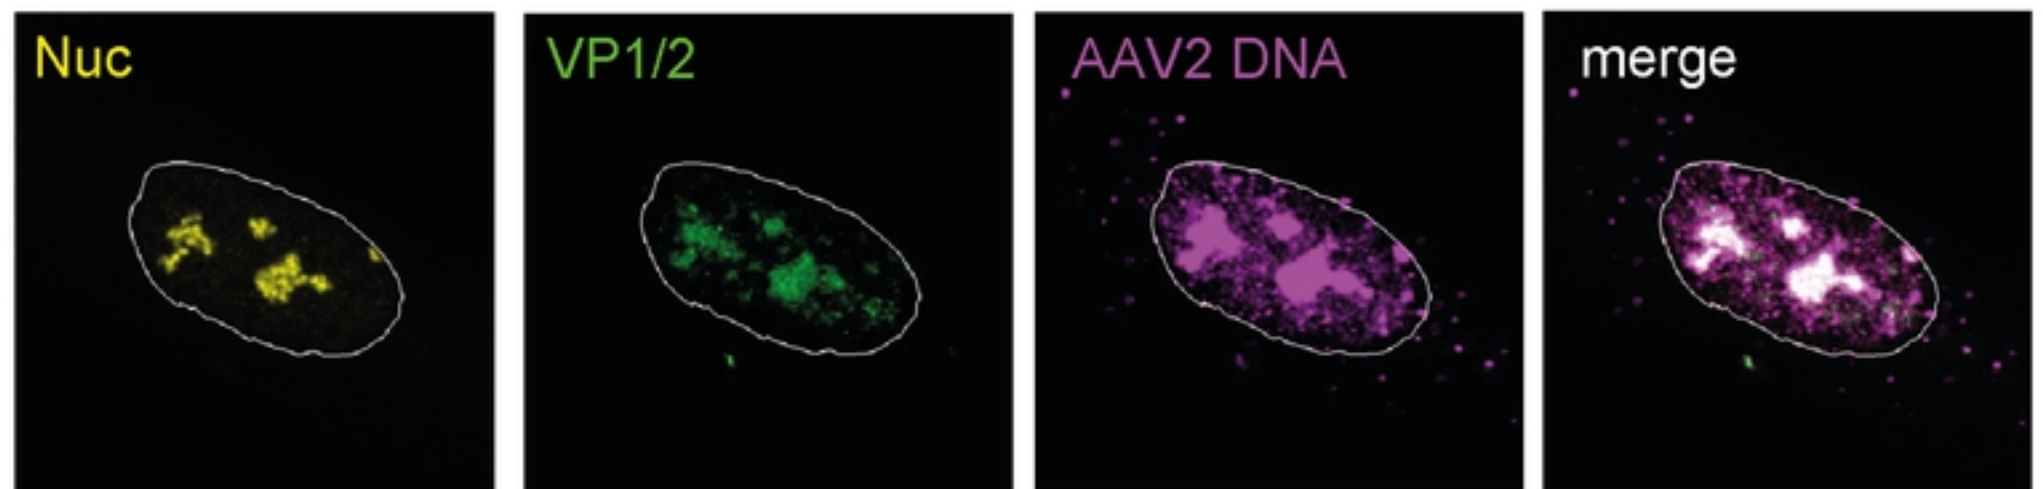**Fig5**

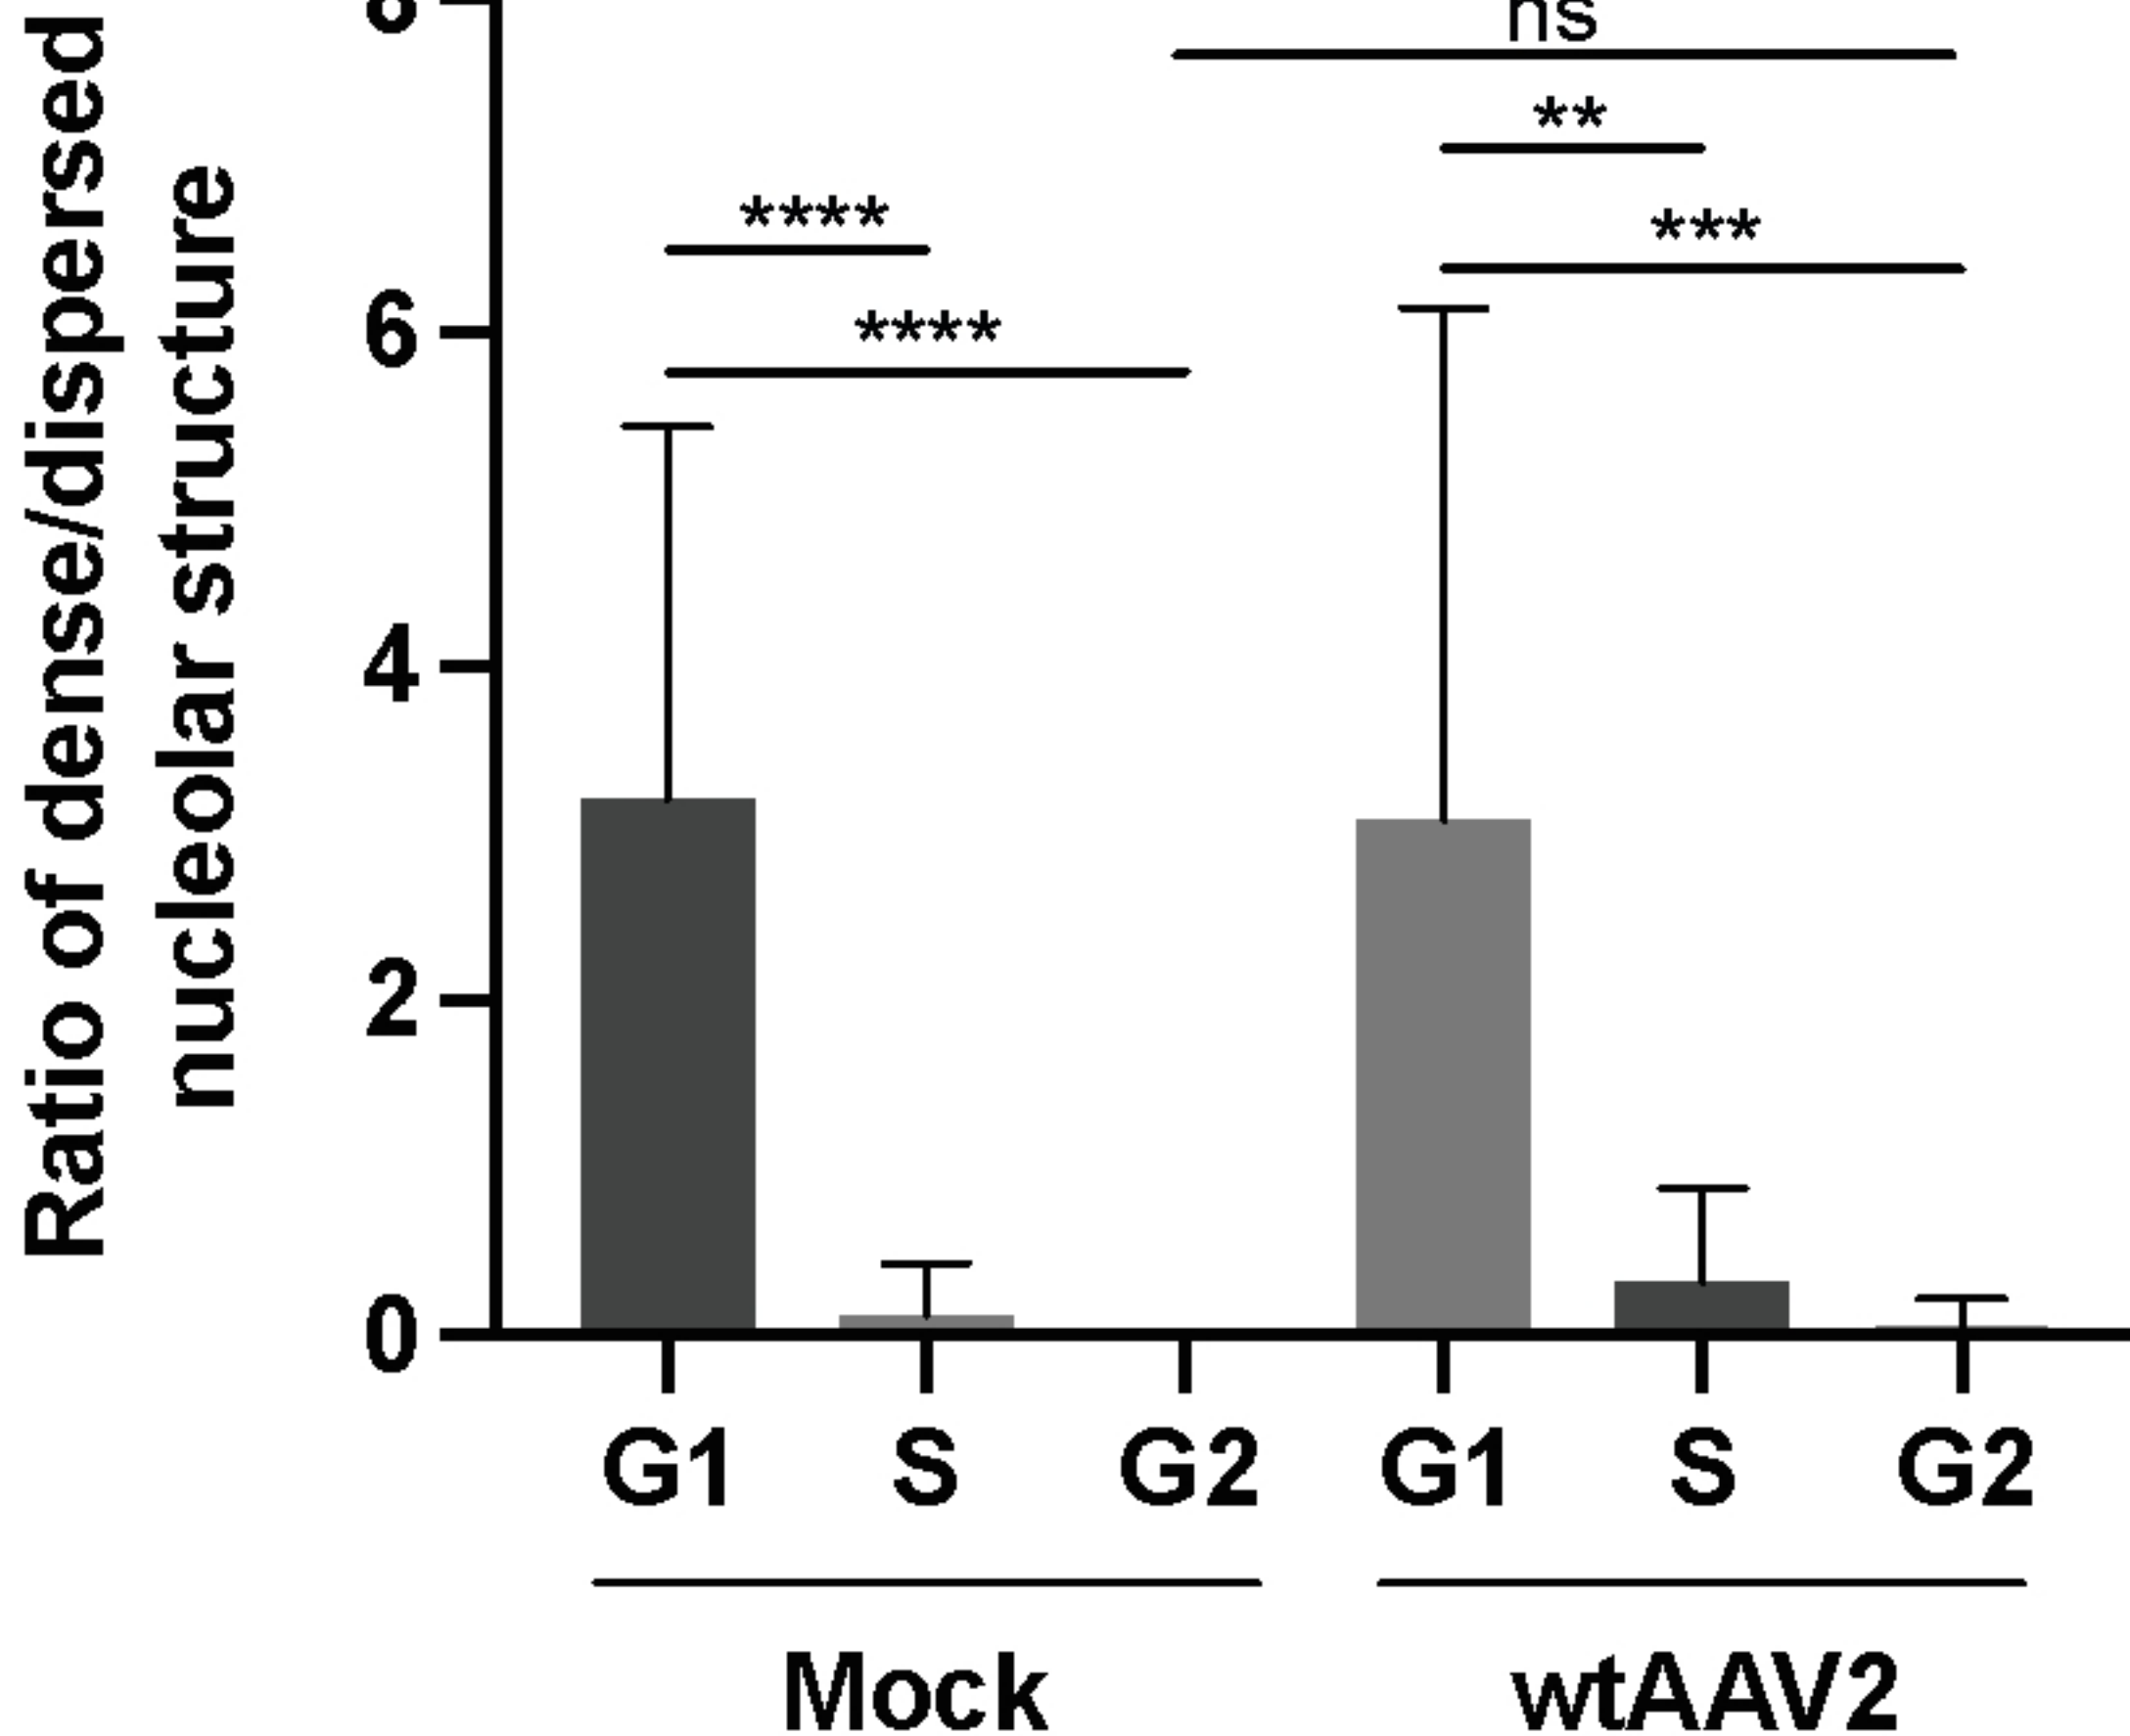

Fig6

**A**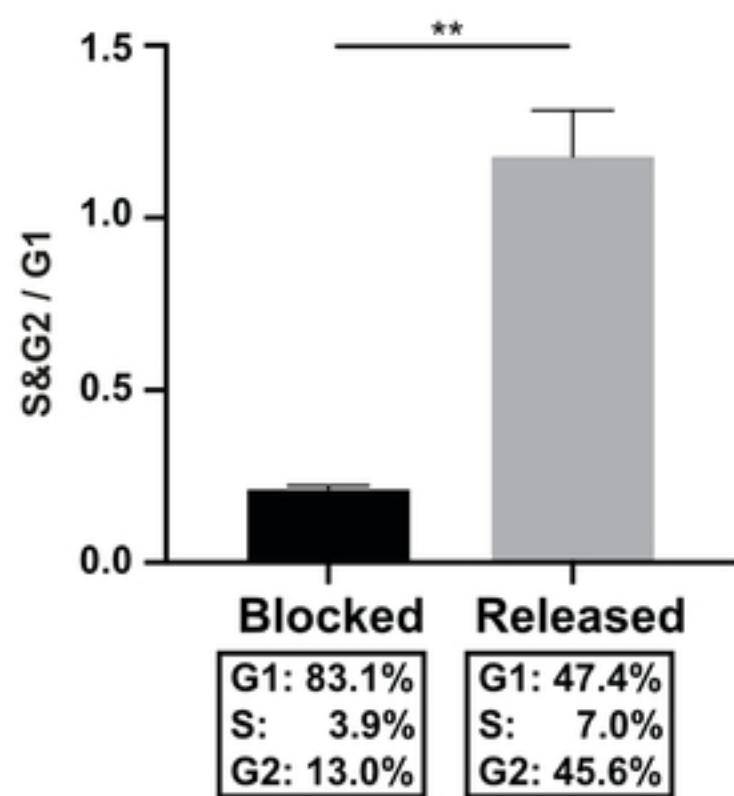**B**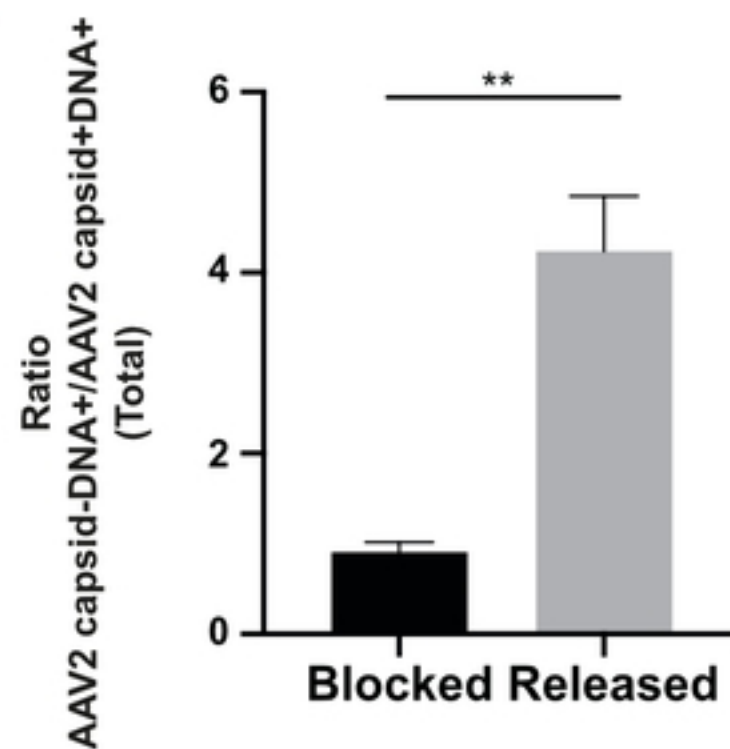**C**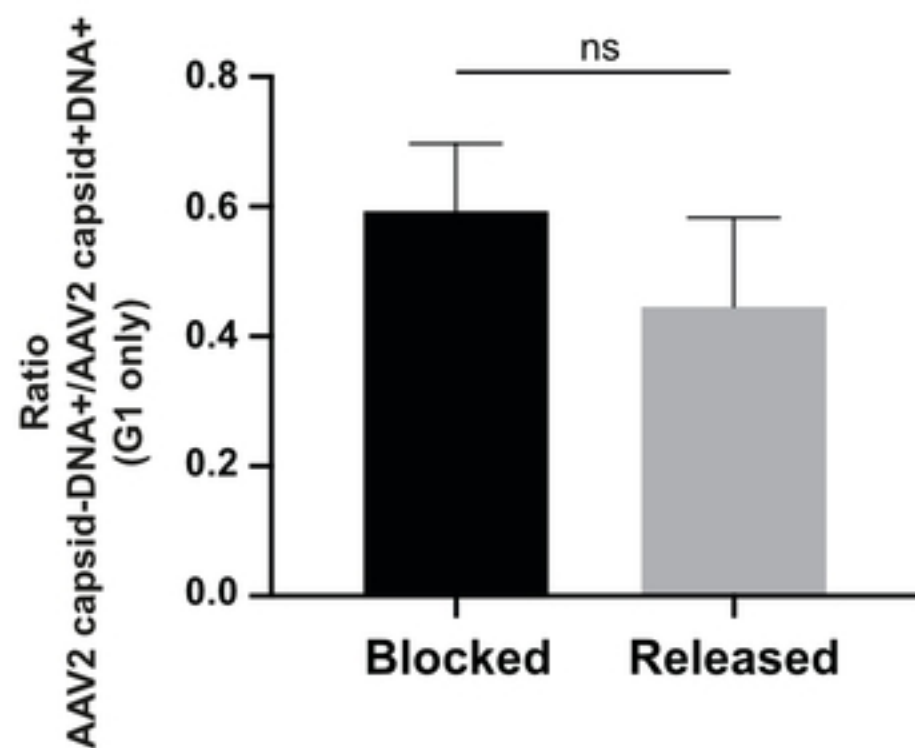**D**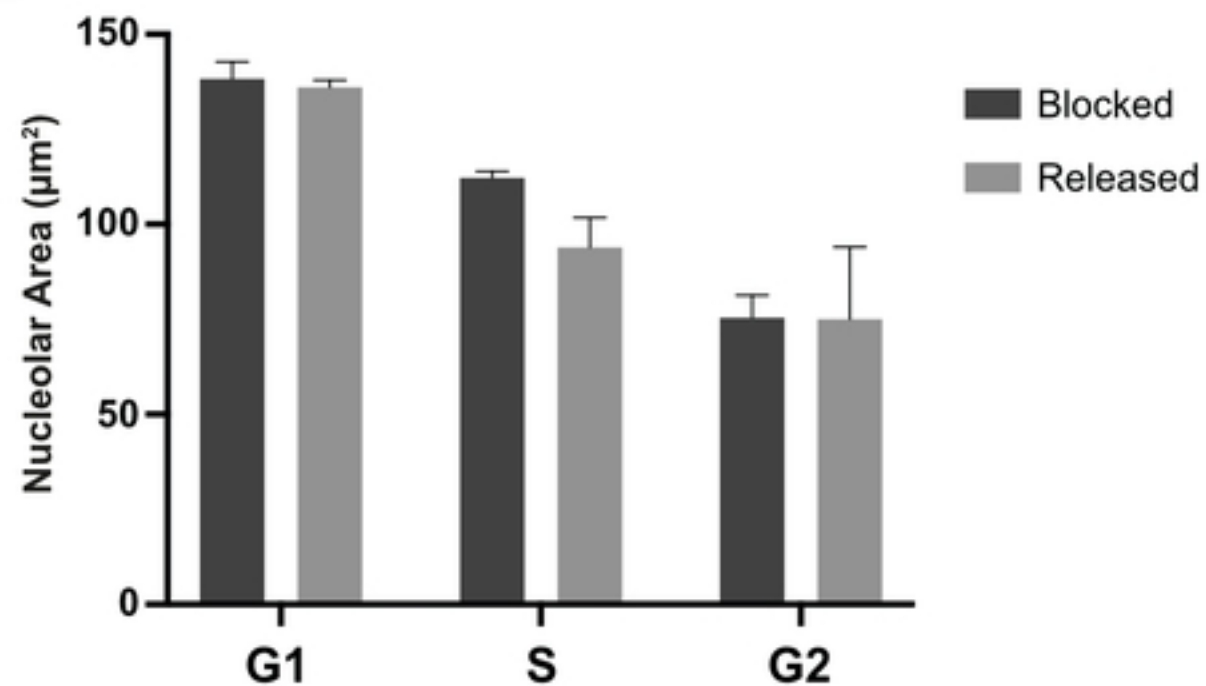

**A**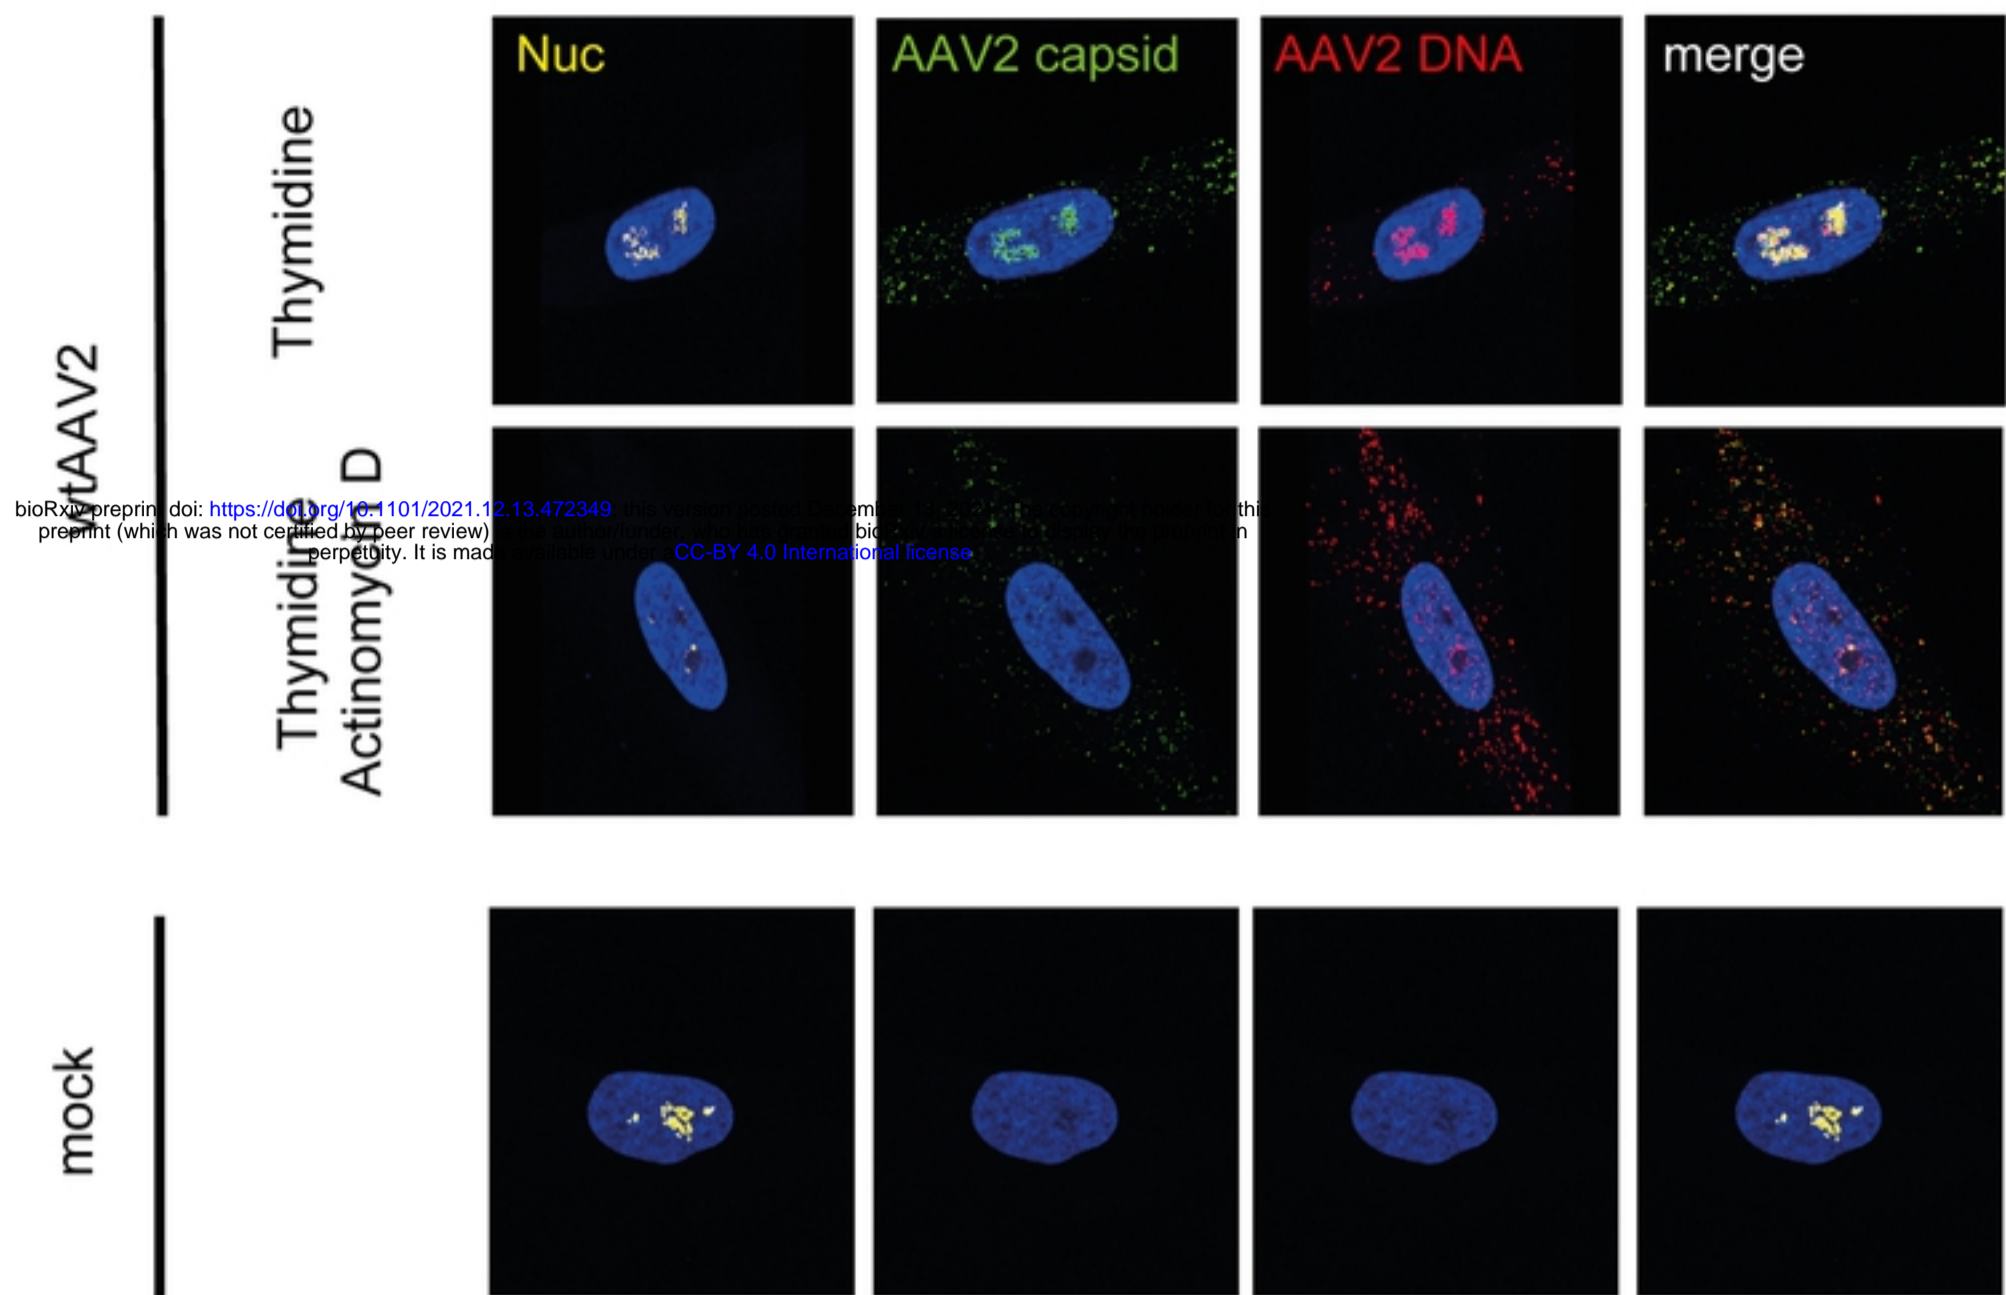**B**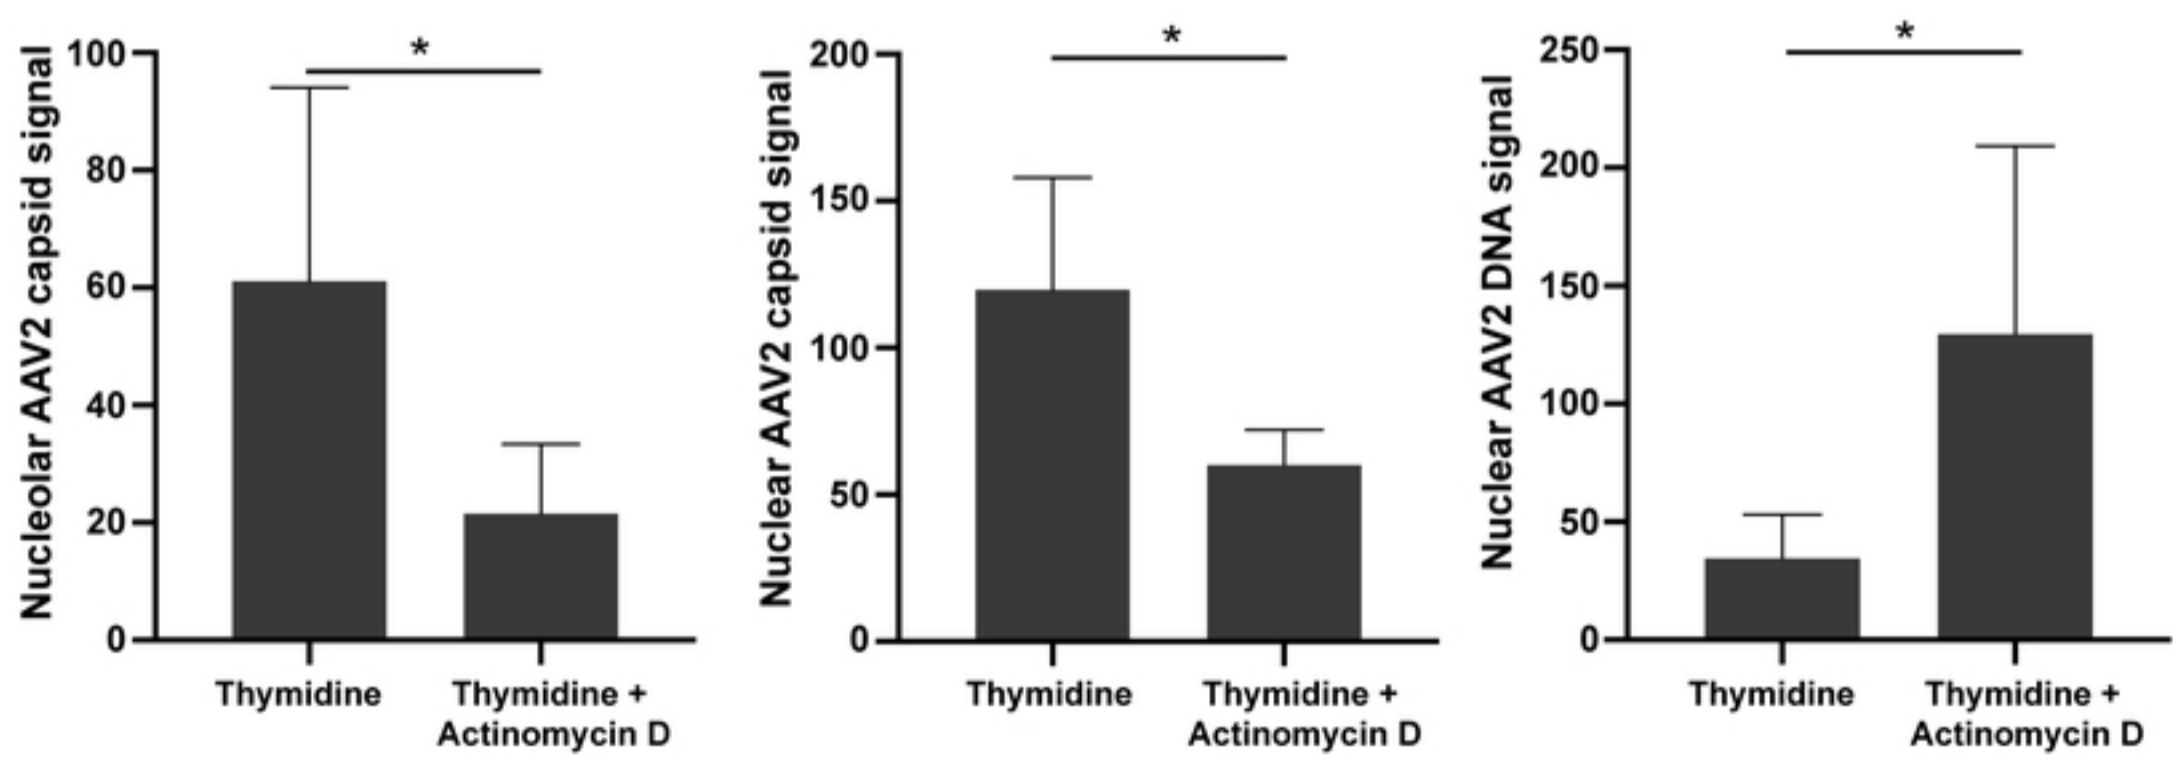

Fig8



**A**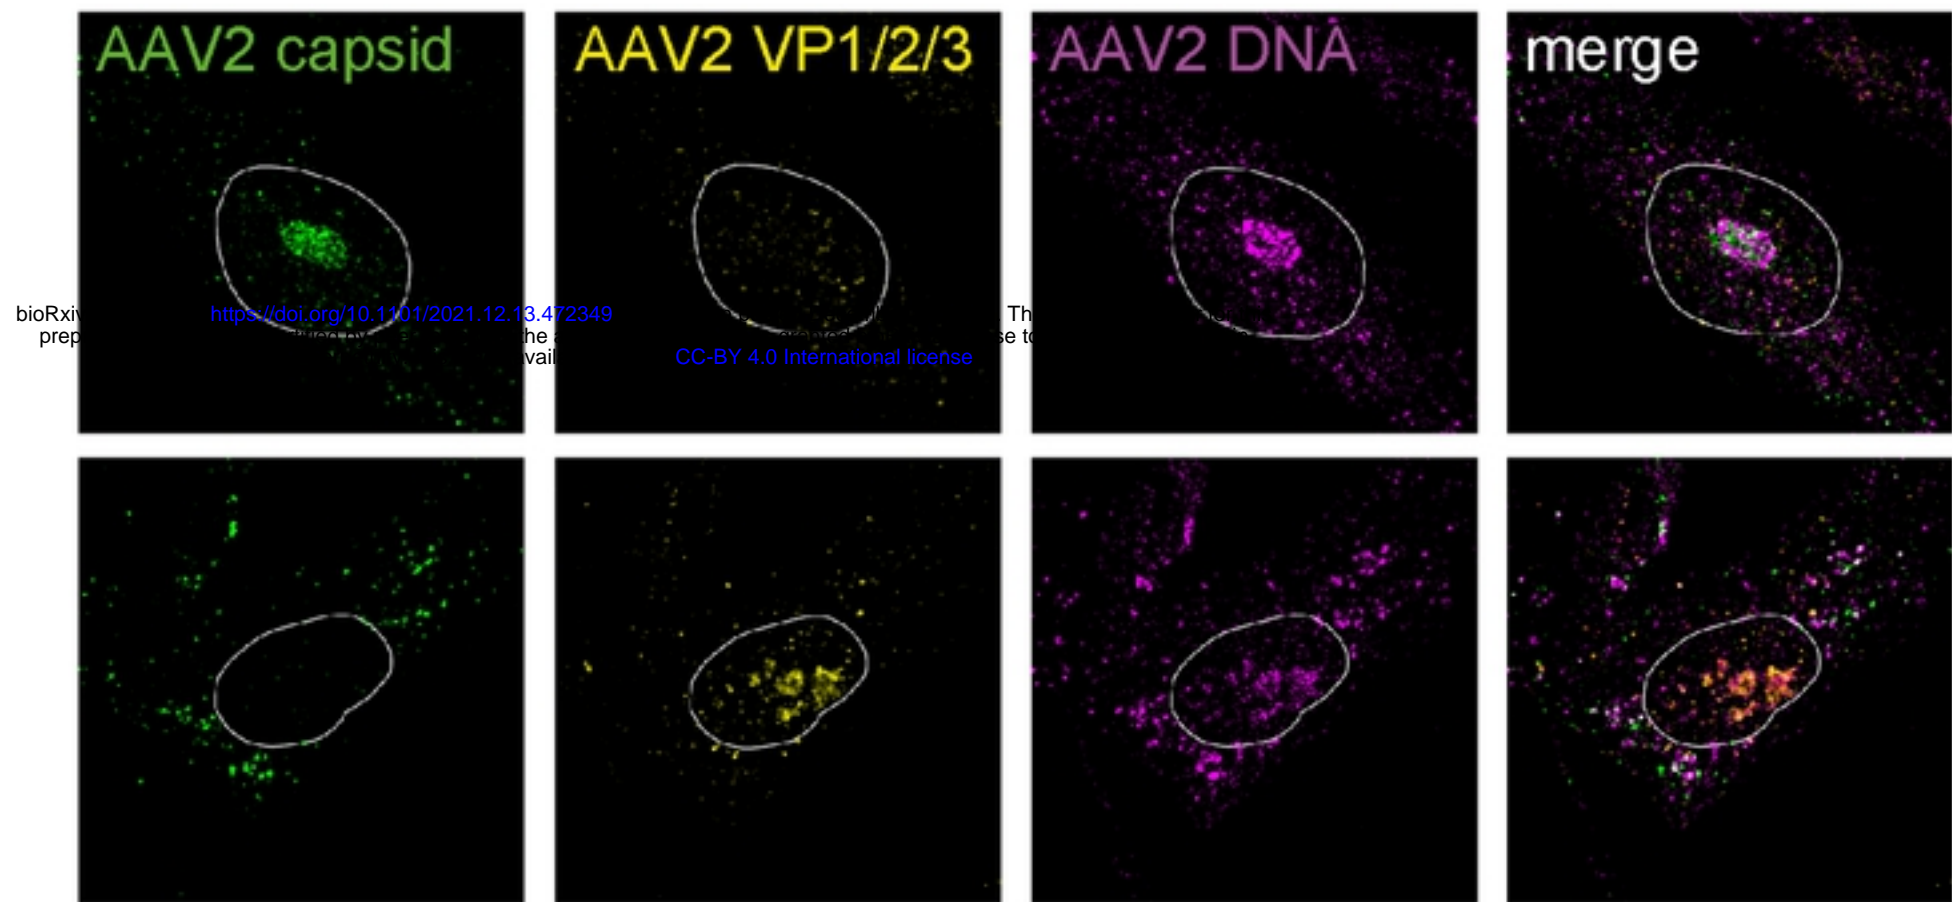**B**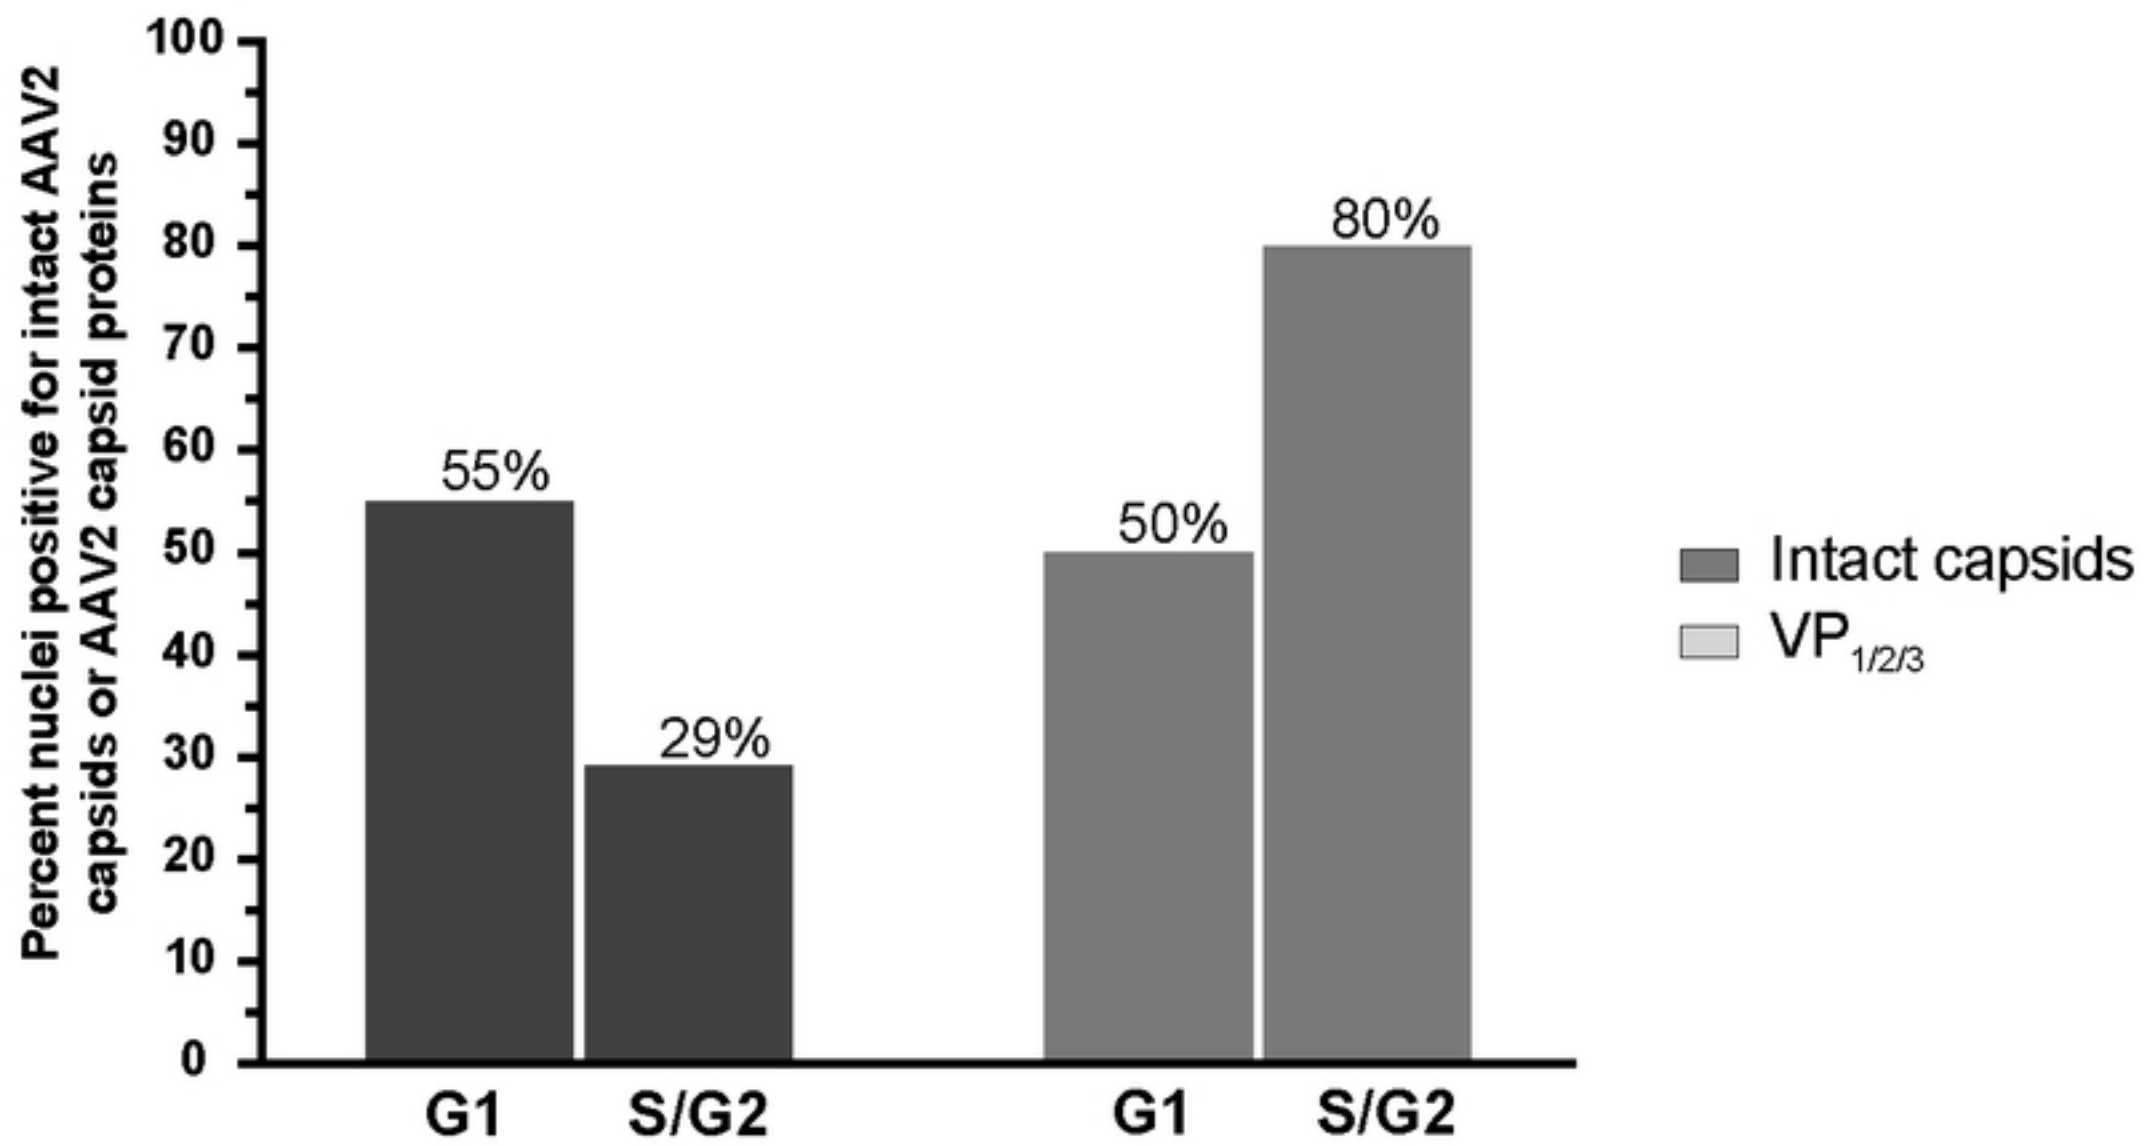

Fig9
